# Supplementary material for: Hybrid multidimensional data acquisition and data processing strategy for comprehensive characterization of known, unknown and isomeric compounds from the compound Dan Zhi Tablet by UPLC-TWIMS-QTOFMS
Source: PubMed Central journal article supplement — RSC Adv. 2019 Mar 15;9(16):8714–27. doi: 10.1039/c8ra10100k (PMC9062044; doi:10.1039/c8ra10100k), 2019-03-15
Supplement: RA-009-C8RA10100K-s001.pdf [file RA-009-C8RA10100K-s001.pdf]

## Supplementary materials

# Hybrid multidimensional data acquisition and data-processing strategy for comprehensive characterization of known, unknown and isomeric compounds from the Compound Danzhi Tablet by UPLC- TWIMS-QTOFMS

Taofang Cheng <sup>a,1</sup>, Ji Ye <sup>b,1</sup>, Huiliang Li <sup>b</sup>, Hongyuan Dong <sup>b</sup>, Ning Xie <sup>c</sup>, Nan Mi<sup>b</sup>, Zhen Zhang <sup>b</sup>, Jingtao Zou <sup>d</sup>, Huizi Jin <sup>a\*</sup>, Weidong Zhang <sup>ab\*</sup>

---

<sup>a</sup> School of Pharmacy, Shanghai Jiao Tong University, Shanghai 200240, China.

<sup>b</sup> School of Pharmacy, Second Military Medical University, Shanghai, 200433, China.

<sup>c</sup> State Key Laboratory of Innovative Natural Medicine and TCM Injections, Jiangxi Qingfeng Pharmaceutical Co., Ltd., Ganzhou 341000, China.

<sup>d</sup> Tonghua Huaxia Pharmaceutical Co., Ltd., Tonghua, 134100, China.

\*Corresponding authors: E-mail: kimhz@sjtu.edu.cn (H.Z. Jin); wdzhangy@hotmail.com (W.D. Zhang); Fax: +86-21-34205989; [Tel:+86-21-34205989](tel:+86-21-34205989). Electronic Supplementary Information (ESI) available: See DOI: 10.1039/x0xx00000x

<sup>1</sup> These authors contributed equally to this work.

## Contents

**Fig. S1** Structures of the representative chemical components identified from the DZT.

**Fig. S2** The fragmentation pathway of senkyunolide A (A), senkyunolide F (B) and calycosin 7-O- $\beta$ -D-glucoside (C) in positive ion mode.

**Fig. S3** The fragmentation pathway (A) and MS/MS spectrum (B) of verbascose in negative ion mode.

**Table S1** LC-MS/MS data for characterization of the chemical constituents from the DZT. (Rt: retention time; SM: *Salvia miltiorrhiza* Bge.; AM: *Astragalus membranaceus* (Fisch.) Bge. var. *mongholicus* (Bge.) Hsiao; LC: *Ligusticum chuanxiong* Hort.; HN: *Hirudo nipponica* Whitman ; PA: *Pheretima aspergillum* (E. Perrier). \*compared with a reference standard.)

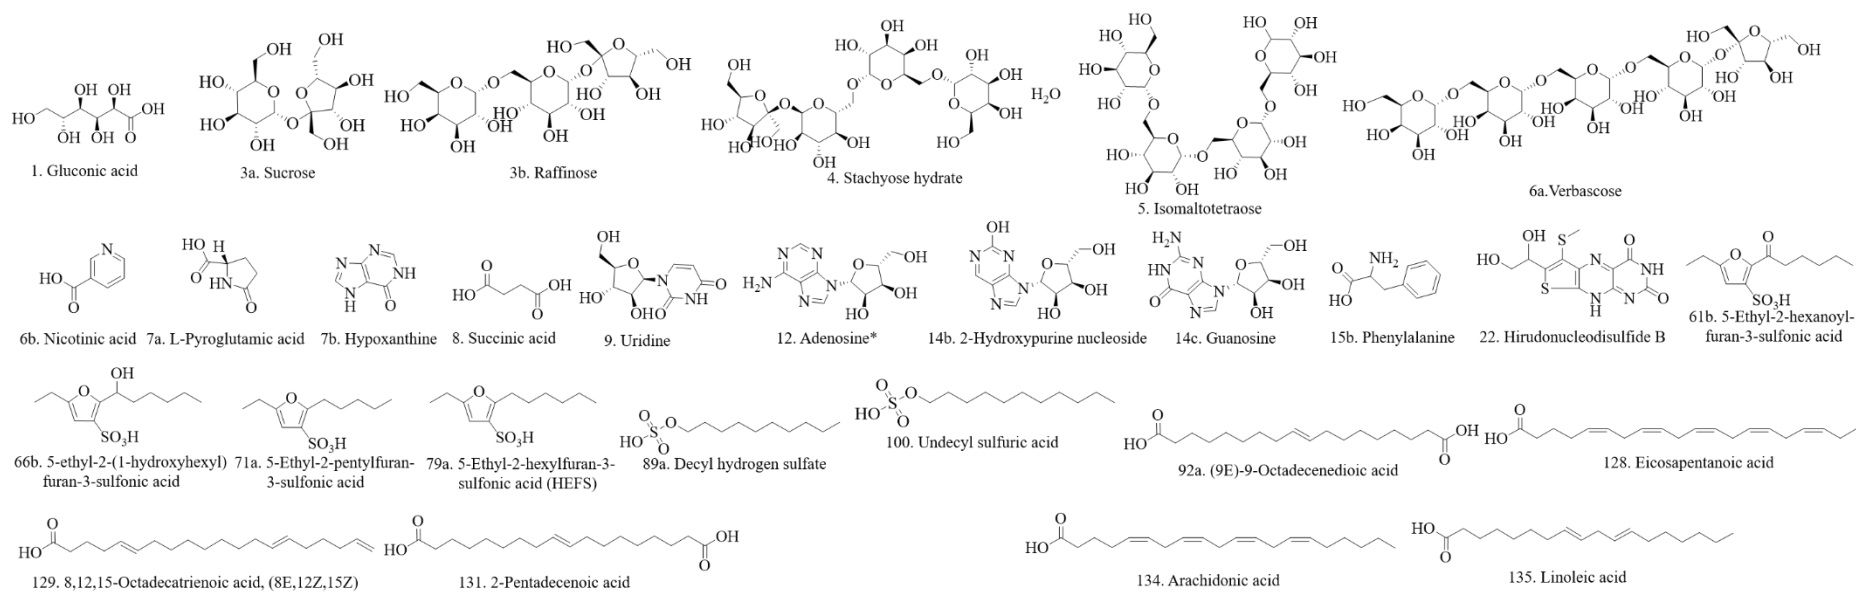

**Fig.S1** Structures of the representative chemical components identified from DZT. (\*compared with a reference standard.)

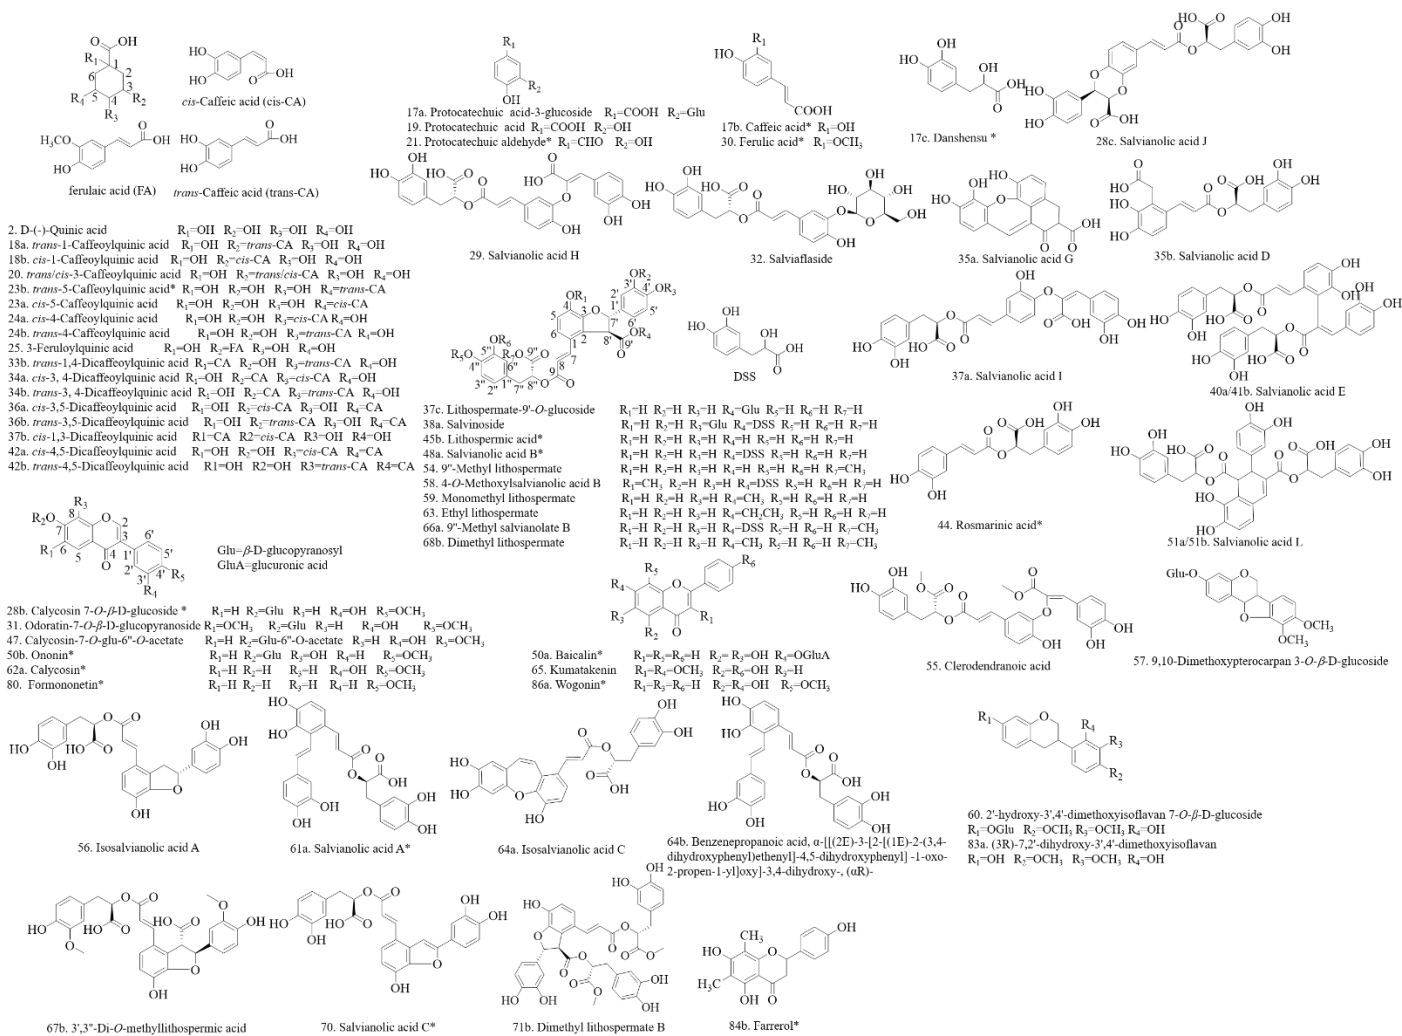

Fig. S1 (Continued).

| Name                                                                | R <sub>1</sub> | R <sub>2</sub> | R <sub>3</sub> | R <sub>4</sub>                                     | R <sub>5</sub> | R <sub>6</sub> | Double bonds             |
|---------------------------------------------------------------------|----------------|----------------|----------------|----------------------------------------------------|----------------|----------------|--------------------------|
| 27. Senkynulide F                                                   | —              | H              | H              | H                                                  | H              | OH             | Δ3a,7a, Δ6,7, Δ3,8       |
| 28a. 3-n-Butyl-3-hydroxy-4,5,6,7-tetrahydro-6,7-dihydroxy phthalide | OH             | H              | H              | OH                                                 | —              | —              | Δ3a,7a                   |
| 38b/45a.Senkynulide N                                               | H              | H              | H              | OH                                                 | —              | —              | Δ3a,7a                   |
| 38b/45a.Senkynulide J                                               | H              | H              | H              | OH                                                 | —              | —              | Δ3a,7a                   |
| 52. Senkynulide IH                                                  | —              | H              | OH             | —                                                  | —              | —              | Δ3a,7a, Δ3,8             |
| 77a. 6,7-Epoxy lignulide                                            | —              | H              | H              | —                                                  | —              | —              | —                        |
| 78. 3-Butylidene phthalide                                          | —              | H              | H              | H                                                  | H              | H              | Δ3a,7a, Δ3,8, Δ4,5, Δ6,7 |
| 82a. (-)-3-Butyl-7-hydroxyphthalide                                 | H              | H              | H              | H                                                  | OH             | H              | Δ3a,7a, Δ4,5, Δ6,7       |
| 81. Senkynulide K                                                   | H              | OH             | H              | H                                                  | H              | H              | Δ3a,7a, Δ6,7             |
| 82b. Senkynulide G                                                  | OH             | H              | H              | H                                                  | H              | H              | Δ3a,7a, Δ6,7             |
| 79a. 3-Butyl-4-hydroxyphthalide                                     | H              | OH             | H              | H                                                  | H              | H              | Δ3a,7a, Δ4,5, Δ6,7       |
| 85a. Senkynulide E                                                  | —              | H              | H              | H                                                  | OH             | H              | Δ3a,7a, Δ3,8, Δ4,5, Δ6,7 |
| 88.Senkynulide M                                                    | —              | H              | H              | —COCH <sub>2</sub> CH <sub>2</sub> CH <sub>3</sub> | OH             | H              | Δ3a,7a, Δ3,8             |
| 88.Senkynulide Q                                                    | —              | H              | H              | —COCH <sub>2</sub> CH <sub>2</sub> CH <sub>3</sub> | OH             | H              | Δ3a,7a, Δ3,8             |
| 93.Senkynulide A                                                    | H              | H              | H              | H                                                  | H              | H              | Δ3a,7a, Δ6,7             |

  

| Name                                | R <sub>1</sub> | R <sub>2</sub>     | R <sub>3</sub>  | R <sub>4</sub>  | Double bonds       |
|-------------------------------------|----------------|--------------------|-----------------|-----------------|--------------------|
| 72b. Tanshinonic acid               | H              | COOH               | CH <sub>3</sub> | CH <sub>3</sub> | —                  |
| 73c. 17-Hydroxy-8-epitanshinone     | H              | CH <sub>3</sub>    | CH <sub>3</sub> | CH <sub>3</sub> | —                  |
| 86b. 3o-Hydroxymethyltanshinquinone | o-OH           | =CH <sub>2</sub>   | —               | CH <sub>3</sub> | Δ15,16             |
| 89b. Tanshinone IIB                 | H              | CH <sub>2</sub> OH | CH <sub>3</sub> | CH <sub>3</sub> | Δ15,16             |
| 94a. Methyltanshinquinone           | H              | =CH <sub>2</sub>   | —               | CH <sub>3</sub> | Δ15,16             |
| 94b. Tanshinol B                    | H              | OH                 | CH <sub>3</sub> | CH <sub>3</sub> | Δ15,16             |
| 96. Trypsanone C                    | H              | COOCH <sub>3</sub> | CH <sub>3</sub> | CH <sub>3</sub> | —                  |
| 102a. Dihydrotanshinone I*          | H              | —                  | CH <sub>3</sub> | CH <sub>3</sub> | Δ1,2, Δ3,4         |
| 103a. 1,2- Dihydrotanshinone I      | H              | H                  | CH <sub>3</sub> | CH <sub>3</sub> | Δ3,4, Δ15,16       |
| 106a. Methyl tanshinonate           | H              | COOCH <sub>3</sub> | CH <sub>3</sub> | CH <sub>3</sub> | Δ15,16             |
| 112. Tanshinone I*                  | H              | —                  | CH <sub>3</sub> | CH <sub>3</sub> | Δ1,2, Δ3,4, Δ15,16 |
| 114b. Monohydroxytanshinone I       | OH             | —                  | CH <sub>3</sub> | CH <sub>3</sub> | Δ1,2, Δ3,4, Δ15,16 |
| 123. Tanshinone IIA*                | H              | CH <sub>3</sub>    | CH <sub>3</sub> | CH <sub>3</sub> | Δ15,16             |
| 130. Cryptotanshinone*              | H              | CH <sub>3</sub>    | CH <sub>3</sub> | CH <sub>3</sub> | —                  |
| 133. 1,2-Didehydrocryptotanshinone  | H              | CH <sub>3</sub>    | CH <sub>3</sub> | CH <sub>3</sub> | Δ1,2               |

  

| Name                                                                                                                  | sn-1                                                                                                   | sn-2                                                                                                                     |
|-----------------------------------------------------------------------------------------------------------------------|--------------------------------------------------------------------------------------------------------|--------------------------------------------------------------------------------------------------------------------------|
| 97d. (2R,3R)-3-Hydroxy-2-[(3Z,8Z,11Z,14Z,17Z)-5,8,11,14,17-icosapentaenoxy]propyl 2-(trimethylammonio)ethyl phosphate | H                                                                                                      | CH <sub>2</sub> (CH <sub>2</sub> CH=CH <sub>2</sub> )(CH <sub>2</sub> ) <sub>2</sub> CO—                                 |
| 98a. Lyso PC 20:5                                                                                                     | CH <sub>2</sub> (CH <sub>2</sub> CH=CH <sub>2</sub> )(CH <sub>2</sub> ) <sub>2</sub> CO—               | H                                                                                                                        |
| 98b. Lysophosphatidylcholine (18:3)                                                                                   | H                                                                                                      | CH <sub>2</sub> (CH <sub>2</sub> CH=CH <sub>2</sub> )(CH <sub>2</sub> ) <sub>2</sub> CO—                                 |
| 103b. (8E)-3-(hexadec-9-en-1-yloxy)-2-hydroxypropyl 2-(trimethylammonio)ethyl phosphate                               | CH <sub>2</sub> (CH <sub>2</sub> ) <sub>2</sub> CH=CH(CH <sub>2</sub> ) <sub>2</sub> CH <sub>2</sub> — | H                                                                                                                        |
| 103c. 3-Hydroxy-2-[(2Z,8Z,11Z,14Z)-5,8,11,14-icosatetraenoxy]propyl 2-(trimethylammonio)ethyl phosphate               | H                                                                                                      | CH <sub>2</sub> (CH <sub>2</sub> )(CH <sub>2</sub> CH=CH <sub>2</sub> )(CH <sub>2</sub> ) <sub>2</sub> CO—               |
| 103d. 1-linoleoyl-2-hydroxy-sn-glycero-3-phosphocholine                                                               | CH <sub>2</sub> (CH <sub>2</sub> ) <sub>2</sub> CH=CH(CH <sub>2</sub> ) <sub>2</sub> CO—               | H                                                                                                                        |
| 105a. 3-hydroxy-2-(pentadecyloxy)propyl 2-(trimethylammonio)ethyl phosphate                                           | H                                                                                                      | CH <sub>2</sub> (CH <sub>2</sub> ) <sub>2</sub> CH <sub>2</sub> —                                                        |
| 106b. (2R,3R)-2-Hydroxy-3-(pentadecyloxy)propyl 2-(trimethylammonio)ethyl phosphate                                   | CH <sub>2</sub> (CH <sub>2</sub> ) <sub>2</sub> CH <sub>2</sub> —                                      | H                                                                                                                        |
| 108b. Lysophosphatidylcholine (18:1)                                                                                  | CH <sub>2</sub> (CH <sub>2</sub> ) <sub>2</sub> CH=CH(CH <sub>2</sub> ) <sub>2</sub> CH=CH—            | H                                                                                                                        |
| 110. 2-Oleyl-sn-glycero-3-phosphatidylcholine                                                                         | H                                                                                                      | CH <sub>2</sub> (CH <sub>2</sub> ) <sub>2</sub> CH=CH(CH <sub>2</sub> ) <sub>2</sub> CO—                                 |
| 111. Phosphatidylcholine (20:2)                                                                                       | H                                                                                                      | CH <sub>2</sub> (CH <sub>2</sub> ) <sub>2</sub> CH <sub>2</sub> —                                                        |
| 113. (2R,3R)-1-(Z)-1-Heptadecan-1-yloxy-2-hydroxypropyl 2-(trimethylammonio)ethyl phosphate                           | CH <sub>2</sub> (CH <sub>2</sub> ) <sub>2</sub> CH=CH—                                                 | H                                                                                                                        |
| 115a. Oleyl lysophosphatidylcholine                                                                                   | CH <sub>2</sub> (CH <sub>2</sub> ) <sub>2</sub> CH=CH(CH <sub>2</sub> ) <sub>2</sub> CO—               | H                                                                                                                        |
| 115b. Lysophosphatidylcholine O-16:0/0:0                                                                              | CH <sub>2</sub> (CH <sub>2</sub> ) <sub>2</sub> CH <sub>2</sub> —                                      | H                                                                                                                        |
| 117. 2-Eicosanoyl-sn-glycero-3-phosphocholine                                                                         | H                                                                                                      | CH <sub>2</sub> (CH <sub>2</sub> ) <sub>2</sub> (CH <sub>2</sub> CH=CH <sub>2</sub> )(CH <sub>2</sub> ) <sub>2</sub> CO— |
| 119. Lysophosphatidylcholine (20:2)                                                                                   | CH <sub>2</sub> (CH <sub>2</sub> ) <sub>2</sub> CH <sub>2</sub> —                                      | H                                                                                                                        |
| 121. 1-Stearoyl-lysophosphatidylcholine                                                                               | CH <sub>2</sub> (CH <sub>2</sub> ) <sub>2</sub> CO—                                                    | H                                                                                                                        |
| 126. Lyso-PAF C-18                                                                                                    | CH <sub>2</sub> (CH <sub>2</sub> ) <sub>2</sub> CH <sub>2</sub> —                                      | H                                                                                                                        |
| 127. 1-O-(17Z-Eicosenoxy)-sn-glycero-3-phosphocholine                                                                 | CH <sub>2</sub> (CH <sub>2</sub> ) <sub>2</sub> CH=CH(CH <sub>2</sub> ) <sub>2</sub> CO—               | H                                                                                                                        |

Fig.S1 (Continued).

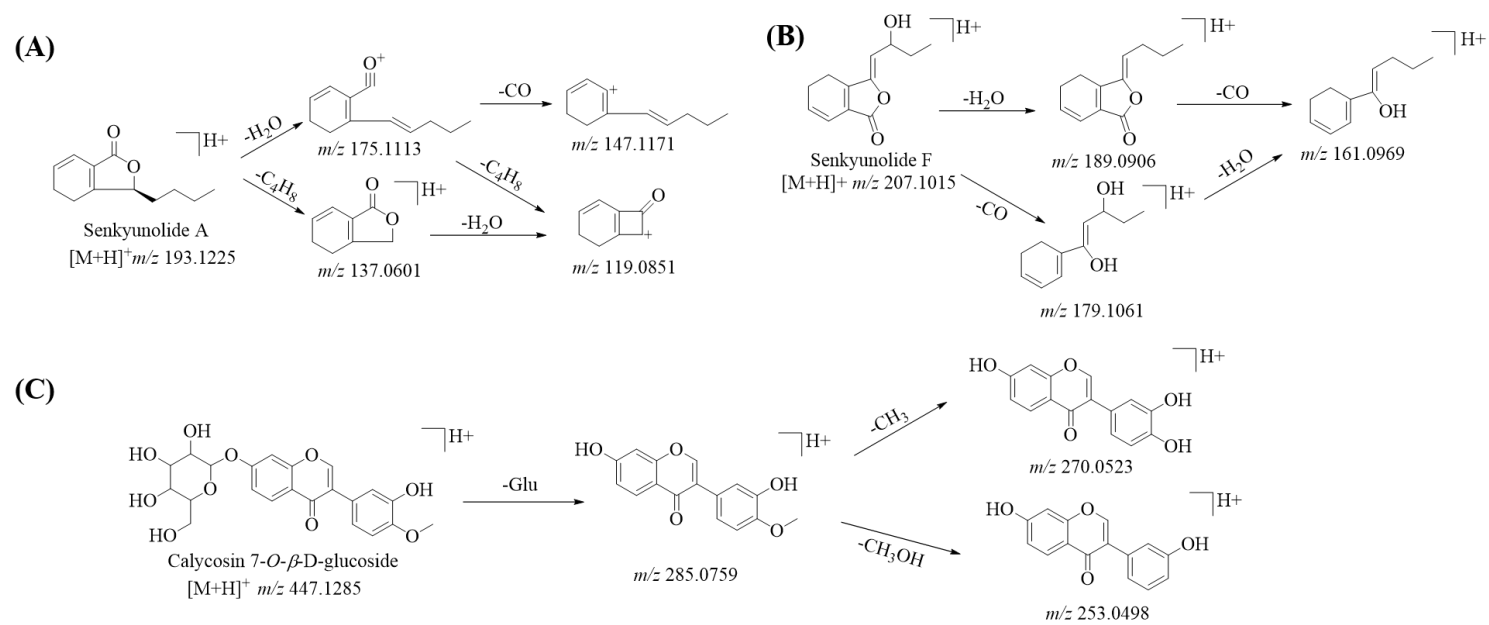

Fig. S2 The fragmentation pathway of senkyunolide A (A), senkyunolide F (B) and calycosin 7-*O*- $\beta$ -D-glucoside (C) in positive ion mode.

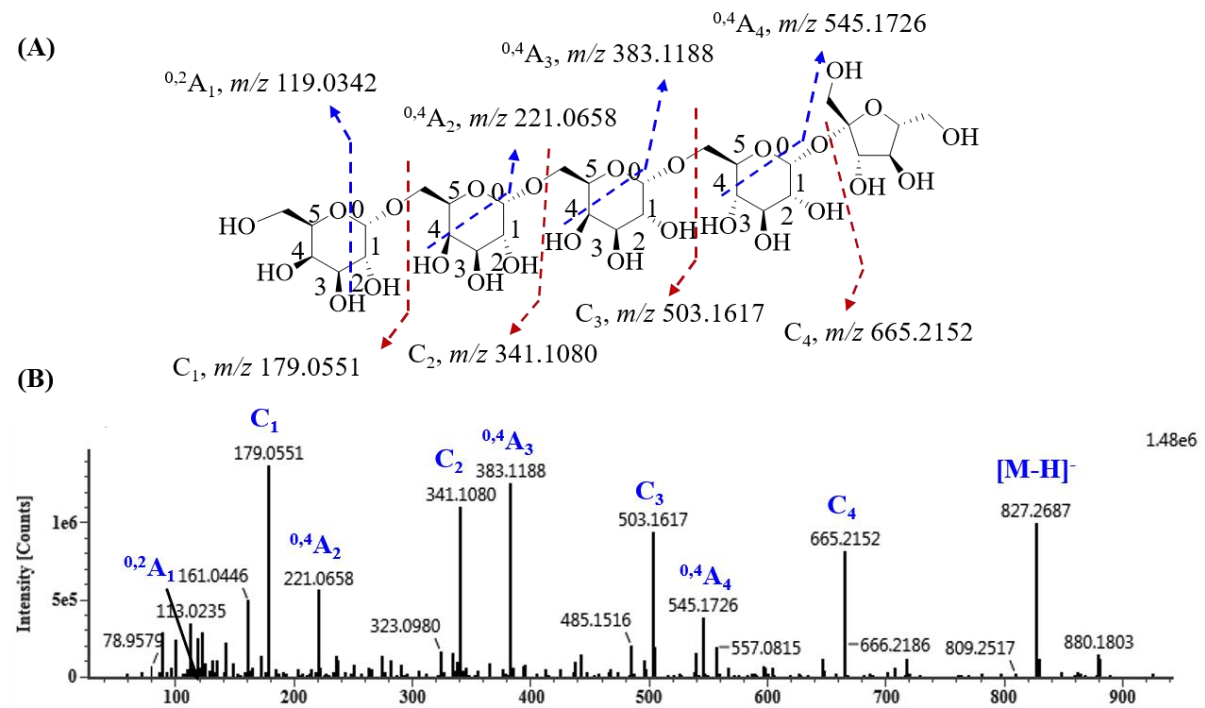

Fig. S3 The fragmentation pathway (A) and MS/MS spectrum (B) of verbascose in negative ion mode.

**Table S1. The list of identified compounds in DZT sample based on UPLC-TWIM-QTOFMS.**

| Peak No. | compound No. | Rt (min) | Formula                                                      | Molecular ion                          | Error (ppm) | Fragment ions                                                                                 | Drift time (ms) | Identification      | Original sources |
|----------|--------------|----------|--------------------------------------------------------------|----------------------------------------|-------------|-----------------------------------------------------------------------------------------------|-----------------|---------------------|------------------|
| 1        | 1            | 0.86     | C <sub>6</sub> H <sub>12</sub> O <sub>7</sub>                | 195.0514 [M-H] <sup>-</sup>            | 4.5         | 177.0382, 159.0298, 141.0196, 129.0179, 111.0080, 99.0078, 87.0083, 75.0081, 71.0130, 57.0326 | 1.73            | Gluconic acid       | LC               |
| 2        | 2            | 0.93     | C <sub>7</sub> H <sub>12</sub> O <sub>6</sub>                | 191.0553 [M-H] <sup>-</sup>            | -4.9        | 173.0455, 155.0338, 131.0339, 109.0299, 85.0293                                               | 1.76            | D- (-)-Quinic acid  | LC/SM            |
| 3        |              |          |                                                              | 343.1241 [M+H] <sup>+</sup>            | 0.8         | 203.0523, 185.0420                                                                            | 4.08            |                     |                  |
|          | 3a           | 0.96     | C <sub>12</sub> H <sub>22</sub> O <sub>11</sub>              | 341.1082 [M-H] <sup>-</sup>            | -1.6        | 323.0980, 281.0878, 221.0660, 179.0552, 161.0445, 143.0351, 119.0342, 101.0240                | 2.81            | Sucrose             | LC/SM/AM         |
|          | 3b           | 0.96     | C <sub>18</sub> H <sub>32</sub> O <sub>16</sub>              | 527.1604 [M+Na] <sup>+</sup>           | 0.7         | 365.1056, 347.0943                                                                            | 5.97            | Raffinose           | LC/SM/AM         |
|          |              |          |                                                              | 503.1615 [M-H] <sup>-</sup>            | 0.5         | 341.1089, 323.0796, 59.0121                                                                   | 3.98            |                     |                  |
| 4        | 4            | 1.03     | C <sub>24</sub> H <sub>44</sub> O <sub>22</sub>              | 683.2282 [M-H] <sup>-</sup>            | 1.2         | 341.1089                                                                                      | 5.17            | Stachyose hydrate   | LC/AM            |
| 5        | 5            | 1.22     | C <sub>24</sub> H <sub>42</sub> O <sub>21</sub>              | 665.2147 [M-H] <sup>-</sup>            | 1.05        | 485.1514, 383.1199, 221.0664, 179.0561                                                        | 4.75            | Isomaltotetraose    | LC/AM            |
| 6        |              |          |                                                              | 827.2687 [M+H] <sup>+</sup> , 873.2743 |             | 665.2152, 647.2038, 545.1726, 503.1617, 485.1516,                                             |                 |                     |                  |
|          | 6a           | 1.33     | C <sub>30</sub> H <sub>52</sub> O <sub>26</sub>              | [M+HCOOH-H] <sup>-</sup>               | -0.1        | 383.1188, 341.1080, 323.0980, 221.0658, 179.0551, 161.0446, 119.0342                          | 6.52            | Verbascose          | LC/AM            |
|          | 6b           | 1.35     | C <sub>6</sub> H <sub>5</sub> NO <sub>2</sub>                | 124.0392 [M+H] <sup>+</sup>            | 2.5         | 106.0289, 96.0442, 84.9612, 80.0494                                                           | 2               | Nicotinic acid      | PA               |
| 7        |              |          |                                                              | 130.0509 [M+H] <sup>+</sup>            | 0.1         | 113.9643, 102.0537, 84.0426, 72.9366                                                          | -               |                     |                  |
|          | 7a           | 1.81     | C <sub>5</sub> H <sub>7</sub> NO <sub>3</sub>                | 128.0344 [M-H] <sup>-</sup>            | 1.4         | -                                                                                             | -               | L-Pyroglutamic acid | HN               |
|          |              |          |                                                              | 137.0467 [M+H] <sup>+</sup>            | 3.1         | 119.0352, 110.0347, 94.0398, 82.0397, 67.0279                                                 | 2.07            |                     |                  |
|          | 7b           | 1.83     | C <sub>5</sub> H <sub>4</sub> N <sub>4</sub> O               | 135.0312 [M-H] <sup>-</sup>            | 0           | 92.03                                                                                         | -               | Hypoxanthine        | PA/HN            |
| 8        | 8            | 2.21     | C <sub>4</sub> H <sub>6</sub> O <sub>4</sub>                 | 117.0182 [M-H] <sup>-</sup>            | -5          | 99.0107, 73.0284                                                                              | -               | Succinic acid       | SM               |
| 9        |              |          |                                                              | 267.0594 [M+Na] <sup>+</sup>           | 2.24        | 211.1075, 136.0619                                                                            | 2.45            |                     |                  |
|          | 9            | 2.43     | C <sub>9</sub> H <sub>12</sub> N <sub>2</sub> O <sub>6</sub> | 243.0626 [M-H] <sup>-</sup>            | 1.2         | 226.0375, 216.0742, 203.1020, 200.0558                                                        | 2.19            | Uridine             | PA/HN            |



|    |     |      |                                                               |                                   |      |                                                                                           |      |                                 |          |
|----|-----|------|---------------------------------------------------------------|-----------------------------------|------|-------------------------------------------------------------------------------------------|------|---------------------------------|----------|
| 10 |     |      |                                                               | 407.1165 [M+Na] <sup>+</sup>      | 1.1  | 245.0630, 227.0528, 203.0523, 164.0342, 132.0723                                          | 4.58 |                                 |          |
|    | 10  | 3.13 | C <sub>14</sub> H <sub>24</sub> O <sub>12</sub>               | 383.1189 [M-H] <sup>-</sup>       | -0.2 | 341.1080, 323.0977, 203.0533, 179.0537, 161.0460,<br>143.0336, 119.0346, 101.0254         | 3.21 | AD-383A                         | LC       |
| 11 |     |      |                                                               | 407.116 [M+Na] <sup>+</sup>       | -0.2 | 245.0623, 227.0526, 203.0530                                                              | 4.50 |                                 |          |
|    | 11  | 3.41 | C <sub>14</sub> H <sub>24</sub> O <sub>12</sub>               | 383.1189 [M-H] <sup>-</sup>       | -1.7 | 341.1087, 323.0953, 179.0570, 161.0450, 135.0303,<br>113.0252, 101.0250                   | 3.18 | AD-383B                         | LC       |
| 12 |     |      |                                                               | 268.1036 [M+H] <sup>+</sup>       | 1.7  | 253.1552, 225.0874, 207.0765, 184.0503, 161.0694,<br>136.0620, 119.0354, 94.0404, 70.0646 | 3.49 | Adenosine*                      | PA/HN    |
|    | 12  | 3.75 | C <sub>10</sub> H <sub>13</sub> N <sub>5</sub> O <sub>4</sub> | 312.0941 [M+HCOOH-H] <sup>-</sup> | -2.6 | 134.0476, 107.0369                                                                        | -    |                                 |          |
| 13 |     |      |                                                               | 407.1153 [M+Na] <sup>+</sup>      | -1.6 | 245.0622, 227.0518, 203.0525, 185.0419                                                    | 4.56 |                                 |          |
|    | 13  | 3.84 | C <sub>14</sub> H <sub>24</sub> O <sub>12</sub>               | 383.1187 [M-H] <sup>-</sup>       | -0.6 | 341.1084, 323.0973, 221.0593, 179.0572, 161.0448,<br>149.0495, 119.0360, 101.0254         | 3.20 | AD-383C                         | LC       |
| 14 |     |      |                                                               | 441.1245 [M-H] <sup>-</sup>       | -1.5 | 341.1087, 221.0688, 179.0568, 161.0460, 119.0349,<br>101.0242                             | 3.36 | ID-441A                         | LC       |
|    | 14a | 3.92 | C <sub>16</sub> H <sub>26</sub> O <sub>14</sub>               | 267.0734 [M-H] <sup>-</sup>       | -0.3 | 253.0839, 179.0548, 149.0460, 135.0301, 108.0191                                          | 2.39 | 2-Hydroxypurine nucleoside      | PA/HN    |
|    | 14b | 3.94 | C <sub>10</sub> H <sub>12</sub> N <sub>4</sub> O <sub>5</sub> | 284.0998 [M+H] <sup>+</sup>       | 2.9  | 269.0887, 152.0571, 135.0304, 110.0347, 86.0954                                           | -    | Guanosine                       | LC/PA/AM |
|    | 14c | 3.94 | C <sub>10</sub> H <sub>13</sub> N <sub>5</sub> O <sub>5</sub> | 282.0844 [M-H] <sup>-</sup>       | 0.2  | 150.0424, 133.0160, 108.0200, 66.0093                                                     | 2.53 |                                 |          |
| 15 |     |      |                                                               | 465.1225 [M+Na] <sup>+</sup>      | 1.1  | 447.1611, 429.1640, 303.0664, 285.0567, 203.0525                                          | 5.05 |                                 |          |
|    | 15a | 4.11 | C <sub>16</sub> H <sub>26</sub> O <sub>14</sub>               | 441.1245 [M-H] <sup>-</sup>       | -1.4 | 341.1081, 281.1276, 179.0555, 161.0449, 143.0350,<br>119.0307, 101.0240                   | 3.31 | ID-441B                         | LC       |
|    | 15b | 4.17 | C <sub>10</sub> H <sub>13</sub> NO <sub>2</sub>               | 180.1027 [M+H] <sup>+</sup>       | 1    | 162.0914, 136.0767, 119.0484, 97.9697, 91.0561                                            | 2.49 | Phenylalanine                   | LC/PA/HN |
| 16 |     |      |                                                               | 441.1245 [M-H] <sup>-</sup>       | -1.8 | 341.1080, 323.0974, 179.0557, 161.0446, 143.0340,<br>119.0341, 101.0228                   | 3.27 | ID-441C                         | LC       |
| 17 |     |      |                                                               | 315.0697 [M-H] <sup>-</sup>       | -2.5 | 153.0169, 128.0347, 109.0280                                                              | 2.86 | Protocatechuic acid-3-glucoside | SM/LC    |
|    | 17a | 4.98 | C <sub>13</sub> H <sub>16</sub> O <sub>9</sub>                | 181.0505 [M+H] <sup>+</sup>       | 5    | 163.0409, 135.0452, 119.0490                                                              | 2.48 | Caffeic acid*                   | SM       |
|    | 17b | 4.99 | C <sub>9</sub> H <sub>8</sub> O <sub>4</sub>                  |                                   |      |                                                                                           |      |                                 |          |

|    |     |      |                                                                              |                              |       |                                                                                          |      |                                         |       |
|----|-----|------|------------------------------------------------------------------------------|------------------------------|-------|------------------------------------------------------------------------------------------|------|-----------------------------------------|-------|
|    |     |      |                                                                              | 179.0338 [M-H] <sup>-</sup>  | -4.6  | 161.0231, 151.0409, 135.0446, 123.0446, 109.0279, 91.0571                                | 1.71 |                                         |       |
|    | 17c | 4.99 | C <sub>9</sub> H <sub>10</sub> O <sub>5</sub>                                | 197.0459 [M-H] <sup>-</sup>  | -2.83 | 179.0334, 173.0224, 152.9044, 135.0439, 123.0452, 109.0304, 72.9919                      | 1.91 | Danshensu*                              | SM    |
| 18 | 18a | 5.26 | C <sub>16</sub> H <sub>18</sub> O <sub>9</sub>                               | 353.0876 [M-H] <sup>-</sup>  | -3.3  | 191.0564                                                                                 | 2.88 | <i>cis</i> -1-Caffeoylquinic acid       | LC    |
|    | 18b | 5.26 | C <sub>16</sub> H <sub>18</sub> O <sub>9</sub>                               | 353.0876 [M-H] <sup>-</sup>  | -3.3  | 191.0564                                                                                 | 3.24 | <i>trans</i> -1-Caffeoylquinic acid     | LC    |
| 19 | 19  | 5.55 | C <sub>7</sub> H <sub>6</sub> O <sub>4</sub>                                 | 153.0183 [M-H] <sup>-</sup>  | 5     | 109.0284                                                                                 | -    | Protocatechuic acid                     | SM/LC |
| 20 |     |      |                                                                              | 377.0854 [M+Na] <sup>+</sup> | 2.8   | 359.0748, 215.0515, 197.0415, 185.0198, 179.0148, 163.0397, 145.0288                     | -    | <i>cis/trans</i> -3-Caffeoylquinic acid | LC    |
|    | 20  | 5.79 | C <sub>16</sub> H <sub>18</sub> O <sub>9</sub>                               | 353.0885 [M-H] <sup>-</sup>  | -2.3  | 191.0571, 179.0358, 161.0224, 135.0453                                                   | 2.88 |                                         |       |
| 21 | 21  | 6.27 | C <sub>7</sub> H <sub>6</sub> O <sub>3</sub>                                 | 137.0236 [M-H] <sup>-</sup>  | -2.8  | 108.011                                                                                  | 1.37 | Protocatechuic aldehyde*                | SM    |
| 22 | 22  | 6.39 | C <sub>11</sub> H <sub>10</sub> N <sub>4</sub> O <sub>4</sub> S <sub>2</sub> | 325.0058 [M-H] <sup>-</sup>  | -4.9  | 306.9959, 291.9714, 278.9647, 263.9798, 232.0069                                         | 2.79 | Hirudonucleodisulfide B                 | HN    |
| 23 | 23a | 6.68 | C <sub>16</sub> H <sub>18</sub> O <sub>9</sub>                               | 353.0875 [M-H] <sup>-</sup>  | -2.6  | 191.0573,                                                                                | 2.87 | <i>cis</i> -5-Caffeoylquinic acid       | LC/AM |
|    |     |      |                                                                              | 377.0855 [M+Na] <sup>+</sup> | 0.3   | 359.0728, 331.0789, 259.1086, 215.0525, 197.0411, 185.0208, 179.0331, 163.0394, 145.0278 | -    | <i>trans</i> -5-Caffeoylquinic acid*    | LC/AM |
|    | 23b | 6.68 | C <sub>16</sub> H <sub>18</sub> O <sub>9</sub>                               | 353.0875 [M-H] <sup>-</sup>  | -2.6  | 191.0573                                                                                 | 3.24 |                                         |       |
| 24 | 24a | 6.88 | C <sub>16</sub> H <sub>18</sub> O <sub>9</sub>                               | 353.0875 [M-H] <sup>-</sup>  | -3    | 191.0559, 179.0343, 173.0458, 135.0454                                                   | 2.88 | <i>cis</i> -4-Caffeoylquinic acid       | LC    |
|    |     |      |                                                                              | 377.0846 [M+Na] <sup>+</sup> | 0.9   | 359.0739, 331.0812, 215.0506, 197.0404, 179.0339, 163.0373, 145.0292                     | -    | <i>trans</i> -4-Caffeoylquinic acid     | LC    |
|    | 24b | 6.88 | C <sub>16</sub> H <sub>18</sub> O <sub>9</sub>                               | 353.0875 [M-H] <sup>-</sup>  | -3    | 191.0550, 179.0337, 173.0453, 161.0235, 135.0452                                         | 3.28 |                                         |       |
| 25 |     |      |                                                                              | 391.1004 [M+Na] <sup>+</sup> | 1.1   | 373.0888, 345.0919, 292.6082, 215.0542, 177.0542, 145.0291, 117.0309                     | 3.26 |                                         |       |
|    | 25  | 7.35 | C <sub>17</sub> H <sub>20</sub> O <sub>9</sub>                               | 367.1025 [M-H] <sup>-</sup>  | -2.1  | 191.0554, 173.0453, 155.0349, 134.0369, 93.0342, 71.0126                                 | 3.65 | 3-Feruloylquinic acid                   | LC    |
| 26 | 26  | 7.76 | C <sub>25</sub> H <sub>24</sub> O <sub>12</sub>                              | 515.1203 [M-H] <sup>-</sup>  | 0.5   | 353.0873, 191.0552, 179.0343, 173.0457, 135.0451                                         | 4.34 | <i>trans</i> -1,3- Dicafeoylquinic acid | LC    |

|    |     |      |                                                 |                                                                   |      |                                                                                                                                                                                                                             |      |                                                                    |       |
|----|-----|------|-------------------------------------------------|-------------------------------------------------------------------|------|-----------------------------------------------------------------------------------------------------------------------------------------------------------------------------------------------------------------------------|------|--------------------------------------------------------------------|-------|
| 27 | 27  | 8.66 | C <sub>12</sub> H <sub>14</sub> O <sub>3</sub>  | 207.1029 [M+H] <sup>+</sup>                                       | 1.8  | 189.0886, 179.1047, 163.1108, 84.9593                                                                                                                                                                                       | -    | Senkyunolide F                                                     | LC    |
| 28 |     |      |                                                 | 265.1036 [M+Na] <sup>+</sup>                                      | 3.7  | 247.0946, 225.0734, 219.0660, 207.0984, 135.0432                                                                                                                                                                            | -    |                                                                    |       |
|    | 28a | 8.84 | C <sub>12</sub> H <sub>18</sub> O <sub>5</sub>  | 241.1086 [M-H] <sup>-</sup>                                       | -3.5 | 223.0931, 205.0860, 197.1190, 179.1082, 155.0350,<br>141.0924, 123.0817, 111.0450, 92.0209                                                                                                                                  | 2.37 | 3-n-butyl-3-hydroxy-4,5,6,7-tetrahydro-<br>6,7-dihydroxy phthalide | LC    |
|    |     |      |                                                 | 447.1285 [M+H] <sup>+</sup>                                       | -0.1 | 285.0759, 270.0523, 253.0498, 225.05488, 213.0552,<br>197.0604, 169.0662, 157.0664, 137.0235, 81.0334                                                                                                                       | 6.09 |                                                                    |       |
|    | 28b | 8.86 | C <sub>22</sub> H <sub>22</sub> O <sub>10</sub> | 445.1134 [M-H] <sup>-</sup> ,<br>491.119 [M+HCOOH-H] <sup>-</sup> | -0.2 | 430.0920, 329.1375, 311.0611, 297.0382, 295.0618,<br>283.0603, 268.0368, 253.0511, 239.0336, 227.0359,<br>219.0679, 211.0349, 135.0078                                                                                      | 4.94 | Calycosin 7-O-β-D-glucoside*                                       | AM    |
|    |     |      |                                                 | 561.1004 [M+Na] <sup>+</sup>                                      | 1.5  | 461.1087, 381.0575, 363.0484, 319.0601, 185.0208,<br>135.0422                                                                                                                                                               | 6.81 |                                                                    |       |
|    | 28c | 8.96 | C <sub>27</sub> H <sub>22</sub> O <sub>12</sub> | 537.1046 [M-H] <sup>-</sup>                                       | 1.5  | 493.1132, 383.0727, 359.0764, 341.0656, 313.0697,<br>295.0610, 253.0872, 225.0520, 197.0447, 185.0237,<br>179.0336, 173.0251, 161.0240, 135.0442, 109.0290,<br>72.9911                                                      | 4.27 | Salvianolic acid J                                                 | SM    |
| 29 |     |      |                                                 | 561.0999 [M+Na] <sup>+</sup>                                      | -1.4 | 381.0576, 319.0579, 297.0703, 279.0629, 261.0541,<br>221.0426                                                                                                                                                               | 6.85 |                                                                    |       |
|    | 29  | 9.03 | C <sub>27</sub> H <sub>22</sub> O <sub>12</sub> | 537.1036 [M-H] <sup>-</sup>                                       | -0.5 | 493.1158, 359.0780, 341.0706, 313.0712, 295.0603,<br>277.0514, 267.0650, 253.0902, 197.0470, 185.0239,<br>179.0339, 173.0229, 161.0246, 135.0459, 109.0280,<br>178.0262, 165.0581, 149.0606, 134.0372, 121.0275,<br>93.0330 | 4.23 | Salvianolic acid H                                                 | SM    |
| 30 | 30  | 9.13 | C <sub>10</sub> H <sub>10</sub> O <sub>4</sub>  | 193.0507 [M-H] <sup>-</sup>                                       | -4.8 | 315.0877, 300.0613, 283.0592, 255.0648, 227.0710,<br>167.0355, 136.0608, 120.0841                                                                                                                                           | 1.8  | Ferulic acid*                                                      | LC/AM |
| 31 |     |      |                                                 | 477.1402 [M+H] <sup>+</sup>                                       | 2.3  | 477.1390, 409.0649, 313.0715, 298.0491, 287.0936,<br>269.0450, 257.0846, 167.0330                                                                                                                                           | -    |                                                                    |       |
|    | 31  | 9.25 | C <sub>23</sub> H <sub>24</sub> O <sub>11</sub> | 521.1296 [M+HCOOH-H] <sup>-</sup>                                 | -0.8 |                                                                                                                                                                                                                             | 4.28 | Odoratin-7-O-β-D-glucopyranoside                                   | AM    |

|    |     |      |                                                 |                             |      |                                                   |      |                                         |    |
|----|-----|------|-------------------------------------------------|-----------------------------|------|---------------------------------------------------|------|-----------------------------------------|----|
| 32 |     |      |                                                 |                             |      | 359.0772, 341.0861, 323.0775, 309.0402, 295.0606, |      |                                         |    |
|    | 32  | 9.35 | C <sub>24</sub> H <sub>26</sub> O <sub>13</sub> | 521.1297 [M-H] <sup>-</sup> | -0.7 | 283.0619, 197.0440, 179.0339, 161.0232, 135.0453, | 4.28 | Salviaflaside                           | SM |
|    |     |      |                                                 |                             |      | 123.0447, 72.9925                                 |      |                                         |    |
| 33 | 33a | 9.47 |                                                 | 515.1203 [M-H] <sup>-</sup> | 0.5  | 353.0876                                          | -    | di-Caffeoylquinic acid isomer           |    |
|    |     |      |                                                 |                             |      | 353.0876, 335.0771, 317.0676, 299.0650, 255.0667, |      |                                         |    |
|    | 33b | 9.47 | C <sub>25</sub> H <sub>24</sub> O <sub>12</sub> | 515.1203 [M-H] <sup>-</sup> | -0.8 | 203.0344, 191.0556, 179.0341, 173.0457, 161.0246, | 4.24 | <i>trans</i> -1,4-Dicaffeoylquinic acid | LC |
|    |     |      |                                                 |                             |      | 135.0450                                          |      |                                         |    |
| 34 |     |      |                                                 | 539.117 [M+Na] <sup>+</sup> | 0.5  | 377.0807, 359.0724, 197.0389                      | -    |                                         |    |
|    | 34a | 9.53 | C <sub>25</sub> H <sub>24</sub> O <sub>12</sub> | 515.1203 [M-H] <sup>-</sup> | -0.8 | 353.0880, 191.0547, 179.0338, 173.0453, 161.0232, | 4.41 | <i>cis</i> -3,4-Dicaffeoylquinic acid   | LC |
|    |     |      |                                                 |                             |      | 135.0440                                          |      |                                         |    |
|    | 34b | 9.53 | C <sub>25</sub> H <sub>24</sub> O <sub>12</sub> | 515.1203 [M-H] <sup>-</sup> | -0.8 | 179.0351, 161.0246                                | 4.89 | <i>trans</i> -3,4-Dicaffeoylquinic acid | CX |
| 35 |     |      |                                                 |                             |      | 321.0418, 295.0599, 277.0488, 267.0664, 252.0414, |      |                                         |    |
|    | 35a | 9.65 | C <sub>18</sub> H <sub>12</sub> O <sub>7</sub>  | 339.0497 [M-H] <sup>-</sup> | -4   | 225.0552, 185.0232, 173.0250, 161.0291, 159.0469, | 2.96 | Salvianolic acid G                      | SM |
|    |     |      |                                                 |                             |      | 145.0294, 109.0304                                |      |                                         |    |
|    | 35b | 9.67 | C <sub>20</sub> H <sub>18</sub> O <sub>10</sub> | 417.0816 [M-H] <sup>-</sup> | -2.7 | 373.0923, 197.0461, 179.0335, 175.0386, 157.0279, | 3.48 | Salvianolic acid D                      | SM |
|    |     |      |                                                 |                             |      | 135.0438, 109.0288, 72.9926                       |      |                                         |    |
| 36 | 36a | 9.71 | C <sub>25</sub> H <sub>24</sub> O <sub>12</sub> | 515.1188 [M-H] <sup>-</sup> | -1.4 | 191.0571, 179.0351, 135.0451                      | 4.26 | <i>cis</i> -3,5-Dicaffeoylquinic acid   |    |
|    |     |      |                                                 |                             |      | 521.1060, 493.1117, 377.0824, 359.0730, 331.0793, |      |                                         |    |
|    |     |      |                                                 | 539.118 [M+Na] <sup>+</sup> | 3.7  | 317.0849, 197.0407, 179.0342, 163.0379, 145.0252, | -    |                                         | LC |
|    | 36b | 9.71 | C <sub>25</sub> H <sub>24</sub> O <sub>12</sub> |                             |      | 135.0454                                          |      | <i>trans</i> -3,5-Dicaffeoylquinic acid |    |
|    |     |      |                                                 | 515.1188 [M-H] <sup>-</sup> | -1.4 | 353.0877, 335.0771, 191.0548, 179.0335, 161.0236, | 4.24 |                                         |    |
|    |     |      |                                                 |                             |      | 135.0438                                          |      |                                         |    |
| 37 |     |      |                                                 |                             |      | 339.0496, 321.0393, 313.1100, 295.0600, 267.0649, |      |                                         |    |
|    | 37a | 9.78 | C <sub>27</sub> H <sub>22</sub> O <sub>12</sub> | 537.1029 [M-H] <sup>-</sup> | -1.7 | 197.0449, 185.0246, 179.0335, 161.0222, 159.0455, | 4.55 | Salvianolic acid I                      | SM |
|    |     |      |                                                 |                             |      | 135.0438, 109.0288, 72.9930                       |      |                                         |    |

|    |     |       |                                                 |                              |      |                                                                                                                                                                                                                                                                                                      |       |                                       |    |
|----|-----|-------|-------------------------------------------------|------------------------------|------|------------------------------------------------------------------------------------------------------------------------------------------------------------------------------------------------------------------------------------------------------------------------------------------------------|-------|---------------------------------------|----|
|    | 37b | 9.78  | C <sub>25</sub> H <sub>24</sub> O <sub>12</sub> | 539.118 [M+Na] <sup>+</sup>  | 3.7  | 521.1060, 493.1117, 377.0824, 359.0730, 331.0793,<br>317.0849, 197.0407, 179.0342, 163.0379, 145.0252,<br>135.0454                                                                                                                                                                                   | -     | <i>cis</i> -1,3-Dicaffeoylquinic acid | LC |
|    | 37c | 9.80  | C <sub>33</sub> H <sub>32</sub> O <sub>17</sub> | 699.1552 [M-H] <sup>-</sup>  | -0.9 | 655.1628, 519.0926, 457.1106, 321.0393, 295.0598,<br>277.0505                                                                                                                                                                                                                                        | -     | Lithospermate-9'-O-glucoside          | DS |
| 38 |     |       |                                                 | 903.1959 [M+Na] <sup>+</sup> | -    | 723.1520, 521.1081, 323.0542                                                                                                                                                                                                                                                                         | 10.18 |                                       |    |
|    | 38a | 9.86  | C <sub>42</sub> H <sub>40</sub> O <sub>21</sub> | 879.1992 [M-H] <sup>-</sup>  | -3.4 | 681.1523, 519.0925, 501.1020, 483.0920, 457.1142,<br>339.0505, 321.0393, 295.0602, 279.0296, 267.0656,<br>197.0435, 185.0242, 179.0349, 173.0239, 161.0263,<br>135.0452, 109.0297, 72.9921                                                                                                           | 6.69  | Salvinoside                           | SM |
|    | 38b | 9.87  | C <sub>12</sub> H <sub>18</sub> O <sub>4</sub>  | 249.1100 [M+Na] <sup>+</sup> | 1    | 209.1156, 191.1039, 163.1081, 153.0573, 147.1150                                                                                                                                                                                                                                                     | -     | Senkyunolide N/Senkyunolide J         | LC |
| 39 |     |       |                                                 | 903.1963 [M+Na] <sup>+</sup> | -1.3 | 741.1398, 723.1525, 705.1424, 561.1001, 543.1040,<br>525.0981, 499.1222, 481.1071, 362.0387, 323.0539,<br>295.0590, 181.0492                                                                                                                                                                         | 10.2  |                                       |    |
|    | 39  | 9.95  | C <sub>42</sub> H <sub>40</sub> O <sub>21</sub> | 879.1992 [M-H] <sup>-</sup>  | -3.4 | 835.1957, 717.1469, 699.1542, 681.1523, 655.1652,<br>637.1571, 621.1002, 561.1033, 519.0926, 501.1040,<br>493.1135, 483.0930, 475.1153, 457.1131, 339.0505,<br>321.0393, 295.0602, 277.0504, 249.0564, 197.0452,<br>185.0245, 179.0349, 173.0243, 159.0450, 135.0454,<br>123.0450, 109.0307, 72.9940 | 6.69  | Salvinoside isomer I                  | SM |
| 40 | 40a | 10.04 | C <sub>36</sub> H <sub>30</sub> O <sub>16</sub> | 717.1451 [M-H] <sup>-</sup>  | -0.2 | 519.0932, 339.0510, 335.0538, 321.0406, 295.0610,<br>291.0633                                                                                                                                                                                                                                        | 5.26  | Salvianolic acid E                    | SM |
|    |     |       |                                                 | 741.1426 [M+Na] <sup>+</sup> | -2   | 561.0993, 543.0878, 381.0560, 363.0483, 319.0570,<br>295.0599, 279.0641, 221.0428, 163.0383                                                                                                                                                                                                          | 8.48  |                                       |    |
|    | 40b | 10.05 | C <sub>36</sub> H <sub>30</sub> O <sub>16</sub> | 717.1451 [M-H] <sup>-</sup>  | -0.2 | 519.0934, 339.0510, 321.0406, 295.0610, 279.0298,<br>277.0501, 265.0499, 249.0553, 221.0602, 197.0458,                                                                                                                                                                                               | 5.86  | salvianolic acid E isomer             | SM |

|    |     |       |                                                 |                              |      |                                                                                                                                                                                  |      |                                         |    |
|----|-----|-------|-------------------------------------------------|------------------------------|------|----------------------------------------------------------------------------------------------------------------------------------------------------------------------------------|------|-----------------------------------------|----|
|    |     |       |                                                 |                              |      | 185.0245, 179.0350, 161.0247, 135.0452, 123.0452,<br>109.0298, 72.9932                                                                                                           |      |                                         |    |
| 41 |     |       |                                                 |                              |      | 699.1522, 681.1523, 655.1799, 519.0935, 501.1033,<br>483.0916, 457.1146, 339.0505, 321.0393, 295.0602,<br>277.0500, 197.0469, 179.0340, 161.0227, 135.0443,<br>109.0287, 72.9927 | 6.84 | Salvinoside isomer II                   | SM |
|    | 41  | 10.17 | C <sub>42</sub> H <sub>40</sub> O <sub>21</sub> | 879.1994 [M-H] <sup>-</sup>  | -3.4 |                                                                                                                                                                                  |      |                                         |    |
| 42 |     |       |                                                 |                              |      | 497.1396, 377.0817, 359.0723, 185.0238, 179.0346,<br>163.0392, 145.0301, 135.0459                                                                                                | -    |                                         |    |
|    | 42a | 10.17 |                                                 | 539.1179 [M+Na] <sup>+</sup> | 3.4  |                                                                                                                                                                                  |      | <i>cis</i> -4,5-Dicaffeoylquinic        | LC |
|    |     |       | C <sub>25</sub> H <sub>24</sub> O <sub>12</sub> |                              |      | 353.0877, 191.0548, 179.0330, 173.0456, 161.0236,<br>135.0440                                                                                                                    | 4.39 |                                         |    |
|    | 42b | 10.17 |                                                 | 515.1191 [M-H] <sup>-</sup>  | -0.8 |                                                                                                                                                                                  |      | <i>trans</i> -4,5-Dicaffeoylquinic acid |    |
|    |     |       |                                                 |                              |      | 353.0877, 191.0548, 179.0330, 173.0456                                                                                                                                           | -    |                                         |    |
| 43 | 43  | 10.25 | C <sub>8</sub> H <sub>16</sub> O <sub>4</sub> S | 207.0702 [M-H] <sup>-</sup>  | -5   | 79.9562                                                                                                                                                                          | 2.14 | Unknown                                 | PA |
| 44 |     |       |                                                 |                              |      | 357.1635, 343.1059, 221.0407, 185.0230, 163.0393,<br>145.0266, 135.0446                                                                                                          | 5.17 |                                         |    |
|    | 44  | 10.33 | C <sub>18</sub> H <sub>16</sub> O <sub>8</sub>  | 383.0744 [M+Na] <sup>+</sup> | 1.7  |                                                                                                                                                                                  |      | Rosmarinic acid*                        | SM |
|    |     |       |                                                 |                              |      | 197.0446, 179.0339, 161.0234, 151.0402, 135.0439,<br>123.0454, 109.0292, 72.9922                                                                                                 | 2.94 |                                         |    |
|    |     |       |                                                 | 359.075 [M-H] <sup>-</sup>   | -2.1 |                                                                                                                                                                                  |      |                                         |    |
| 45 | 45a | 10.41 | C <sub>12</sub> H <sub>18</sub> O <sub>4</sub>  | 249.1103 [M+Na] <sup>+</sup> | 2.3  | 231.1358, 209.1159, 163.1111                                                                                                                                                     | -    | Senkyunolide N/Senkyunolide J           | LC |
|    |     |       |                                                 |                              |      | 547.1145, 517.1084, 381.0629, 363.0488, 337.0653,<br>319.0580, 281.0419, 163.0385                                                                                                | 6.51 |                                         |    |
|    | 45b | 10.43 | C <sub>27</sub> H <sub>22</sub> O <sub>12</sub> |                              |      | 493.1168, 383.0768, 339.0506, 313.0721, 295.0603,<br>277.0495, 267.0652, 225.0544, 197.0460, 185.0233,<br>179.0338, 173.0231, 159.0440, 145.0292, 135.0440,<br>109.0284          | 4.67 | Lithospermic acid *                     | SM |
|    |     |       |                                                 | 537.1033 [M-H] <sup>-</sup>  | -0.8 |                                                                                                                                                                                  |      |                                         |    |
| 46 | 46  | 10.65 | C <sub>23</sub> H <sub>36</sub> O <sub>12</sub> | 527.2115 [M+Na] <sup>+</sup> | 1.8  | 483.2148, 437.1775, 395.1667, 351.1784, 335.0950,<br>317.0837, 275.0791, 233.1133, 131.0505, 103.0543                                                                            | -    | LD-503                                  | LC |

|    |     |       |                                                  |                                                                    |      |                                                                                                                                                                         |      |                                                               |       |
|----|-----|-------|--------------------------------------------------|--------------------------------------------------------------------|------|-------------------------------------------------------------------------------------------------------------------------------------------------------------------------|------|---------------------------------------------------------------|-------|
|    |     |       |                                                  | 503.213 [M-H] <sup>-</sup> ,<br>549.2181 [M+HCOOH-H] <sup>-</sup>  | -0.4 | 341.1084, 221.0685, 191.0550, 161.0456, 149.0452,<br>131.0351, 113.0244, 101.0238, 89.0234, 85.0294,<br>71.0127, 59.0125                                                | 4.6  |                                                               |       |
| 47 | 47  | 10.9  | C <sub>24</sub> H <sub>24</sub> O <sub>11</sub>  | 489.1394 [M+H] <sup>+</sup>                                        | 0.8  | 285.0762, 270.0526, 253.0492, 225.0538, 197.0583,<br>169.0635, 137.0244                                                                                                 | -    | Calycosin-7-O-glc-6''-O-acetate                               | AM    |
|    |     |       |                                                  | 533.1301 [M+HCOOH-H] <sup>-</sup>                                  | 0    | 283.0616, 268.0374                                                                                                                                                      | 5.34 |                                                               |       |
| 48 |     |       |                                                  | 719.1608 [M+H] <sup>+</sup> ,<br>741.1427 [M+Na] <sup>+</sup>      | 0.2  | 561.1005, 543.0890, 517.1114, 381.0571, 363.0471,<br>337.0677, 319.0577, 295.0613, 279.0626, 251.0708,<br>221.0407, 203.0333, 181.0499, 161.0415, 139.0381,<br>135.0449 | 8.61 | Salvianolic acid B*                                           | SM    |
|    |     |       |                                                  | 717.1458 [M-H] <sup>-</sup>                                        | 0.3  | 519.0956, 339.0520, 321.0414, 295.0613, 277.0499                                                                                                                        | 5.85 |                                                               |       |
|    | 48b | 10.91 | C <sub>36</sub> H <sub>30</sub> O <sub>16</sub>  | 717.1455 [M-H] <sup>-</sup>                                        | 0.3  | 537.1032, 519.0930, 493.1148, 339.0502, 321.0411,<br>295.0613, 279.0300, 277.0499, 249.0548, 229.0141,<br>197.0460, 185.0243, 179.0344, 135.0450, 109.0294              | 5.91 | Salvianolic acid B isomer I                                   | SM    |
| 49 | 49  | 10.95 | C <sub>12</sub> H <sub>20</sub> O <sub>5</sub> S | 275.0948 [M-H] <sup>-</sup>                                        | 0.2  | 257.0842, 195.1381, 184.9905, 165.1280, 135.0280,<br>121.0289, 80.9632, 79.9562                                                                                         | 2.67 | 5-Ethyl-2-(1-hydroxyhexyl) furan-3-<br>sulfonic acid isomer I | PA    |
| 50 |     |       |                                                  | 447.0918 [M+H] <sup>+</sup> ,<br>469.0754 [M+Na] <sup>+</sup>      | 0.8  | 431.1417, 382.1012, 331.1571, 293.0408, 271.0605,<br>237.0813, 229.1936, 211.0639, 121.1010                                                                             | 5.48 | Baicalin*                                                     | SM/AM |
|    | 50a | 10.98 | C <sub>21</sub> H <sub>18</sub> O <sub>11</sub>  | 445.077 [M-H] <sup>-</sup>                                         | -1.4 | 269.0441, 251.0336, 241.0487, 223.0397, 213.0519,<br>197.0597, 181.0608, 169.0672, 113.0246, 85.0294                                                                    | 3.98 |                                                               |       |
|    |     |       |                                                  | 431.1335 [M+H] <sup>+</sup>                                        | -0.3 | 291.0632, 269.0810, 255.2027, 227.1799                                                                                                                                  | 5.85 |                                                               |       |
|    | 50b | 11.01 | C <sub>22</sub> H <sub>22</sub> O <sub>9</sub>   | 429.1179 [M-H] <sup>-</sup> , 475.1243<br>[M+HCOOH-H] <sup>-</sup> | -0.6 | 267.0654, 252.0417, 223.0391, 208.0522, 135.0074,<br>132.0211, 91.0195                                                                                                  | 4.77 | Ononin*                                                       | AM    |
| 51 | 51a | 11.19 |                                                  | 717.1437 [M-H] <sup>-</sup>                                        | 2.6  | 519.0927, 321.0400                                                                                                                                                      | 5.08 | Salvianolic acid L/isomer                                     |       |
|    | 51b | 11.19 | C <sub>36</sub> H <sub>30</sub> O <sub>16</sub>  | 717.1437 [M-H] <sup>-</sup>                                        | 2.6  | 519.0928, 339.0513, 321.0400                                                                                                                                            | 5.55 | Salvianolic acid L/isomer                                     | SM    |

|    |    |       |                                                 |                                                               |     |                                                                                                                                                                                   |      |                                                                                            |      |                              |    |
|----|----|-------|-------------------------------------------------|---------------------------------------------------------------|-----|-----------------------------------------------------------------------------------------------------------------------------------------------------------------------------------|------|--------------------------------------------------------------------------------------------|------|------------------------------|----|
| 52 | 52 | 11.3  | C <sub>12</sub> H <sub>16</sub> O <sub>4</sub>  | 247.0946 [M+Na] <sup>+</sup>                                  | 0.8 | 207.1015, 189.09057, 171.0817, 161.09687, 143.0848,<br>119.0846, 105.0692, 91.0533                                                                                                | 3.65 | Senkyunolide I/Senkyunolide H                                                              | LC   |                              |    |
| 53 |    |       |                                                 | 719.1613 [M+H] <sup>+</sup> ,<br>741.1483 [M+Na] <sup>+</sup> | 1   | 561.1012, 543.0861, 517.1089, 381.0580, 362.0398,<br>337.0674, 319.0595, 295.0602, 233.0634, 221.0431,<br>135.0445                                                                | 5.56 |                                                                                            |      |                              |    |
|    | 53 | 11.37 | C <sub>36</sub> H <sub>30</sub> O <sub>16</sub> |                                                               |     | 559.0833, 537.1035, 519.0935, 515.0954, 493.1139,<br>717.1457 [M-H] <sup>-</sup>                                                                                                  | 0.2  | 339.0507, 335.0538, 321.0402, 295.0614, 291.0632,<br>185.0245                              | 5.56 | Salvianolic acid B isomer II | SM |
| 54 |    |       |                                                 |                                                               |     | 507.1292, 463.1431, 327.0882, 309.0773, 294.0534,<br>283.0979, 277.0508, 266.0559, 197.0459, 185.0243,<br>179.0352, 159.0442, 145.0288, 135.0457, 123.0443,<br>108.0204, 72.9925  |      |                                                                                            |      |                              |    |
|    | 54 | 11.4  | C <sub>28</sub> H <sub>24</sub> O <sub>12</sub> | 551.1196 [M-H] <sup>-</sup>                                   | 0.3 |                                                                                                                                                                                   | -    | 9''-Methyl lithospermate                                                                   | SM   |                              |    |
| 55 |    |       |                                                 |                                                               |     | 519.0918, 409.0873, 385.0907, 367.0822, 339.0499,<br>321.0395, 293.04489, 277.0488, 245.0451, 229.0127,<br>197.0442, 185.0244, 179.0340, 173.0235, 135.0444,<br>109.0278, 72.9913 |      |                                                                                            |      |                              |    |
|    | 55 | 11.58 | C <sub>29</sub> H <sub>26</sub> O <sub>12</sub> | 565.1356 [M-H] <sup>-</sup>                                   | 0.7 |                                                                                                                                                                                   | 4.94 | Clerodendranic acid                                                                        | SM   |                              |    |
| 56 |    |       |                                                 | 495.1265 [M+H] <sup>+</sup> ,<br>517.1110 [M+Na] <sup>+</sup> | 1   | 337.0695, 319.0557, 297.0756, 279.0663, 269.0842,<br>251.0681, 233.0574, 221.0415, 205.0610, 163.0399,<br>135.0431                                                                | -    |                                                                                            |      |                              |    |
|    | 56 | 11.64 | C <sub>26</sub> H <sub>22</sub> O <sub>10</sub> |                                                               |     | 313.0721, 295.0603, 277.0495, 267.0652, 225.0544,<br>493.1123 [M-H] <sup>-</sup>                                                                                                  | -0.3 | 197.0458, 185.0233, 179.0338, 173.0231, 159.0440,<br>145.0296, 135.0440, 109.0284, 72.9934 | 4.16 | Isosalvianolic acid A        | SM |
| 57 |    |       |                                                 | 463.1608 [M+H] <sup>+</sup> ,<br>485.1429 [M+Na] <sup>+</sup> | 1   | 301.1072, 286.0819, 273.1114, 269.0800, 253.0450,<br>241.0847, 191.0698, 167.0708, 152.0468, 147.0442,<br>134.0363, 123.0440, 105.0340, 78.0461                                   |      |                                                                                            |      |                              |    |
|    | 57 | 11.69 | C <sub>23</sub> H <sub>26</sub> O <sub>10</sub> |                                                               |     |                                                                                                                                                                                   | 5.56 | 9,10-Dimethoxypterocarpan 3-O-β-D-glucoside                                                | AM   |                              |    |



|    |       |                                                 |                                                               |      |                                                                                             |      |                                                                |    |
|----|-------|-------------------------------------------------|---------------------------------------------------------------|------|---------------------------------------------------------------------------------------------|------|----------------------------------------------------------------|----|
|    |       |                                                 | 507.1506 [M+HCOOH-H] <sup>-</sup>                             | -0.4 | 299.0915, 284.0684, 269.0446, 241.0505, 225.1143,<br>197.0547, 181.1306                     | 5.1  |                                                                |    |
| 58 |       |                                                 |                                                               |      | 575.1140, 557.1040, 531.1276, 446.1271, 395.0732,                                           |      |                                                                |    |
|    |       |                                                 | 755.1607 [M+Na] <sup>+</sup>                                  | 3.1  | 377.0637, 359.0486, 351.0833, 333.0766, 309.0730,<br>277.0434, 265.0812                     | -    |                                                                |    |
| 58 | 11.97 | C <sub>37</sub> H <sub>32</sub> O <sub>16</sub> |                                                               |      | 551.1202, 533.1089, 519.0937, 353.0654, 335.0548,                                           |      | 4-O-Methoxysalvianolic acid B                                  | SM |
|    |       |                                                 | 731.1617 [M-H] <sup>-</sup>                                   | 0.3  | 320.0323, 309.0766, 294.0536, 276.0404, 197.0455,<br>185.0248, 179.0347, 135.0452, 108.0208 | 6.08 |                                                                |    |
| 59 |       |                                                 |                                                               |      | 521.1079, 355.0801, 323.0550, 295.0609, 277.0502,                                           |      |                                                                |    |
|    |       |                                                 | 553.1358 [M+H] <sup>+</sup>                                   | 1.9  | 267.0655, 253.0499, 249.0554, 221.0600, 153.0547                                            | -    | Monomethyl lithospermate                                       | SM |
| 59 | 12.02 | C <sub>28</sub> H <sub>24</sub> O <sub>12</sub> |                                                               |      | 519.0925, 353.0666, 339.0509, 321.0398, 295.0613,                                           |      |                                                                |    |
|    |       |                                                 | 551.1193 [M-H] <sup>-</sup>                                   | -0.3 | 277.0507, 231.0295, 197.0420, 135.0449, 109.0291                                            | 4.62 |                                                                |    |
| 60 |       |                                                 | 465.1766 [M-H] <sup>-</sup> , 487.1594<br>[M+Na] <sup>+</sup> | 1.4  | 325.0997, 293.2119, 275.2001, 257.1903, 229.1919,<br>180.0425, 167.0680, 139.1115, 109.0982 | 5.9  | 2'-hydroxy-3',4'-dimethoxyisoflavan 7-<br>O-β-D-glucoside      | AM |
|    | 60    | 12.07                                           | C <sub>23</sub> H <sub>28</sub> O <sub>10</sub>               |      | 463.1603 [M-H] <sup>-</sup>                                                                 | -0.9 |                                                                |    |
|    |       |                                                 |                                                               |      | 313.0721, 295.0603, 277.0495, 267.0652, 225.0544,<br>109.0284, 72.9931                      |      |                                                                |    |
| 61 |       |                                                 | 493.1133 [M-H] <sup>-</sup>                                   | -0.9 | 185.0233, 179.0338, 173.0231, 159.0440, 135.0440,<br>109.0284, 72.9931                      | 4.12 | Salvianolic acid A*                                            | SM |
|    | 61a   | 12.18                                           | C <sub>26</sub> H <sub>22</sub> O <sub>10</sub>               |      |                                                                                             |      |                                                                |    |
|    |       |                                                 |                                                               |      | 257.0849, 243.0692, 204.0095, 188.9867, 175.0075,<br>111.0451, 95.9500, 80.9643, 79.9566    | 2.69 | 5-Ethyl-2-hexanoylfuran-3-sulfonic acid                        | PA |
|    | 61b   | 12.18                                           | C <sub>12</sub> H <sub>18</sub> O <sub>5</sub> S              |      |                                                                                             |      |                                                                |    |
|    |       |                                                 | 285.0776 [M+H] <sup>+</sup> ,                                 |      | 270.0565, 253.0502, 242.0575, 225.0550, 197.0587,                                           |      |                                                                |    |
| 62 |       |                                                 | 307.0594 [M+Na] <sup>+</sup>                                  | 0.2  | 169.0654, 137.0240, 81.0323                                                                 | 3.59 | Calycosin*                                                     | AM |
|    | 62a   | 12.32                                           | C <sub>16</sub> H <sub>12</sub> O <sub>5</sub>                |      | 283.061 [M-H] <sup>-</sup>                                                                  | -3.4 |                                                                |    |
|    |       |                                                 |                                                               |      | 268.0379, 240.0360, 225.1502, 211.0389, 135.0074                                            | 2.69 |                                                                |    |
|    |       |                                                 |                                                               |      | 257.0835, 243.0679, 214.0290, 204.0085, 188.9851,<br>175.0062, 159.9829, 111.0443, 79.9560  |      | 5-Ethyl-2-(1-hydroxyhexyl) furan-3-<br>sulfonic acid isomer II | PA |
|    | 62b   | 12.37                                           | C <sub>12</sub> H <sub>20</sub> O <sub>5</sub> S              |      |                                                                                             |      |                                                                |    |

|    |     |       |                                                  |                                                                                                                                        |            |                                                                                                                                                                        |              |                                                                                                                                                                               |    |
|----|-----|-------|--------------------------------------------------|----------------------------------------------------------------------------------------------------------------------------------------|------------|------------------------------------------------------------------------------------------------------------------------------------------------------------------------|--------------|-------------------------------------------------------------------------------------------------------------------------------------------------------------------------------|----|
| 63 | 63  | 12.41 | C <sub>29</sub> H <sub>26</sub> O <sub>12</sub>  | 565.1354 [M-H] <sup>-</sup>                                                                                                            | 0.5        | 519.0923, 367.0858, 339.0489, 321.0394, 293.04555,<br>277.0501, 245.0467, 197.0457, 185.0259, 135.0437                                                                 | 4.83         | Ethyl lithospermate                                                                                                                                                           | SM |
| 64 | 64a | 12.67 | C <sub>26</sub> H <sub>20</sub> O <sub>10</sub>  | 491.0977 [M-H] <sup>-</sup>                                                                                                            | -1.4       | 311.0549, 293.0445, 276.0409, 265.0497, 249.0548,<br>197.0447, 179.0348, 159.0442, 135.0462, 128.0357,<br>109.0320                                                     | 3.99         | Isosalvianolic acid C                                                                                                                                                         | SM |
|    | 64b | 12.7  | C <sub>29</sub> H <sub>26</sub> O <sub>12</sub>  | 565.1348 [M-H] <sup>-</sup>                                                                                                            | -0.7       | 519.0925, 385.1276, 367.0810, 339.0503, 321.0400,<br>303.0275, 293.0449, 277.0502, 245.0443, 229.0114,<br>197.0470, 185.0235, 179.0342, 135.0453, 109.0298,<br>72.9914 | 4.78         | 3-Benzofurancarboxylic acid, 2-(3,4-<br>dihydroxyphenyl)-4-[3-[1-[(3,4-<br>dihydroxyphenyl) methyl]-2-ethoxy-2-<br>oxoethoxy]-3-oxo-1-propen-1-yl]-2,3-<br>dihydro-7-hydroxy- | SM |
| 65 | 65  | 12.8  | C <sub>17</sub> H <sub>14</sub> O <sub>6</sub>   | 315.0847 [M+H] <sup>+</sup><br>313.0714 [M-H] <sup>-</sup>                                                                             | 1.9<br>-1  | 300.0623, 283.0595, 167.0337<br>298.0503, 283.0265, 269.0510, 211.1363, 142.0537                                                                                       | 3.98<br>2.96 | Kumatakenin                                                                                                                                                                   | AM |
| 66 | 66a | 12.8  | C <sub>37</sub> H <sub>32</sub> O <sub>16</sub>  | 731.1626 [M-H] <sup>-</sup>                                                                                                            | 0.3        | 551.1200, 533.1085, 353.0661, 335.0557, 339.0511,<br>321.0398, 309.0757, 295.0605, 197.0430, 179.0343,<br>135.0450, 109.0311                                           | 6.02         | 9''-Methyl salvianolate B                                                                                                                                                     | SM |
|    | 66b | 12.87 | C <sub>12</sub> H <sub>20</sub> O <sub>5</sub> S | 275.0947 [M-H] <sup>-</sup>                                                                                                            | 0.2        | 257.0782, 231.1440, 211.1319, 189.9926, 174.9683,<br>155.1060, 111.0065, 98.0375, 80.9631, 79.9554                                                                     | 2.62         | 5-Ethyl-2-(1-hydroxyhexyl) furan-3-<br>sulfonic acid                                                                                                                          | PA |
| 67 | 67a | 12.93 | C <sub>65</sub> H <sub>106</sub> O <sub>32</sub> | 1399.6749 [M+H] <sup>+</sup> ,<br>1421.6571 [M+Na] <sup>+</sup><br>1397.6616 [M-H] <sup>-</sup> ,<br>1443.666 [M+HCOOH-H] <sup>-</sup> | 0.1<br>0.7 | 473.3265, 455.3520, 437.3414<br>1073.5551, 911.5008, 893.4883, 749.4526, 603.3902,<br>585.3756, 471.3449, 179.0553, 161.0442, 101.0232,<br>89.0232                     | -<br>13.29   | Astrogaloside-1397                                                                                                                                                            | -  |
|    |     |       |                                                  | 565.1356 [M-H] <sup>-</sup>                                                                                                            | 0.1        | 519.0923, 385.0935, 367.0826, 339.0513, 321.0406,<br>293.0431, 277.0436, 245.0445, 185.0286, 179.0331,<br>161.0217, 135.0434                                           | 4.77         |                                                                                                                                                                               |    |
| 68 | 68a | 13.44 | C <sub>47</sub> H <sub>78</sub> O <sub>19</sub>  | 947.5211 [M+H] <sup>+</sup>                                                                                                            | 0.2        | 473.3711, 455.3518, 437.3428, 419.3307, 401.3190                                                                                                                       | -            |                                                                                                                                                                               | AM |

|     |       |                                                 |                                                  |      |                                                   |       |  |                                       |    |
|-----|-------|-------------------------------------------------|--------------------------------------------------|------|---------------------------------------------------|-------|--|---------------------------------------|----|
|     |       |                                                 |                                                  |      | 945.5075, 927.4970, 783.4534, 765.4380, 621.4044, |       |  | Astragaloside V/Astragaloside         |    |
|     |       |                                                 | 991.5137 [M+HCOOH-H] <sup>-</sup>                | 1.8  | 161.0429, 131.0339, 113.0254, 101.0245, 89.0235,  | 8.57  |  | VI/Astragaloside VII                  |    |
|     |       |                                                 |                                                  |      | 85.0292                                           |       |  |                                       |    |
|     |       |                                                 | 567.1515 [M+H] <sup>+</sup> ,                    |      | 369.0977, 323.0559, 315.0872, 295.0610, 277.0507, |       |  |                                       |    |
|     |       |                                                 | 589.1329 [M+Na] <sup>+</sup>                     | 2.2  | 269.0819, 249.0554, 221.0602, 187.0396, 137.0234, | 7.37  |  |                                       |    |
|     |       |                                                 |                                                  |      | 109.0292                                          |       |  |                                       |    |
| 68b | 13.46 | C <sub>29</sub> H <sub>26</sub> O <sub>12</sub> |                                                  |      | 519.0924, 385.0936, 367.0816, 339.0512, 321.0399, |       |  | Dimethyl lithospermate                | SM |
|     |       |                                                 | 565.1349 [M-H] <sup>-</sup>                      | 0.7  | 303.0289, 293.0447, 277.0505, 245.0448, 229.0147, | 4.96  |  |                                       |    |
|     |       |                                                 |                                                  |      | 197.0464, 185.0244, 179.0348, 173.0230, 135.0441, |       |  |                                       |    |
|     |       |                                                 |                                                  |      | 109.0284, 72.9945                                 |       |  |                                       |    |
| 69  |       |                                                 | 1075.5623 [M+H] <sup>+</sup> ,                   |      |                                                   |       |  |                                       |    |
|     |       |                                                 | 1097.5492 [M+Na] <sup>+</sup>                    | 0.2  | 455.3531, 437.3415                                | -     |  |                                       | -  |
|     |       |                                                 |                                                  |      |                                                   |       |  |                                       |    |
|     | 69a   | 13.78                                           | C <sub>53</sub> H <sub>86</sub> O <sub>22</sub>  |      |                                                   |       |  | Astrogaloside-1073A                   |    |
|     |       |                                                 | 1073.5562 [M-H] <sup>-</sup> ,                   |      | 749.4489, 603.3409, 585.3800, 471.3485, 323.0867, |       |  |                                       |    |
|     |       |                                                 | 1119.5613 [M+HCOOH-H] <sup>-</sup>               | 0.8  | 179.0551, 161.0447, 113.0212                      | 10.66 |  |                                       |    |
|     |       |                                                 |                                                  |      |                                                   |       |  |                                       |    |
|     |       |                                                 | 947.5228 [M+H] <sup>+</sup> ,                    |      |                                                   |       |  |                                       |    |
|     |       |                                                 | 969.503 [M+Na] <sup>+</sup>                      | -0.3 | 473.3613, 455.3520, 437.3414, 419.3308, 401.3196  | 13.25 |  |                                       |    |
|     |       |                                                 |                                                  |      |                                                   |       |  |                                       |    |
|     | 69b   | 13.78                                           | C <sub>47</sub> H <sub>78</sub> O <sub>19</sub>  |      |                                                   |       |  | Astragaloside V/Astragaloside         | AM |
|     |       |                                                 | 945.5063 [M-H] <sup>-</sup> , 991.5129           |      | 945.5076, 927.4843, 783.4559, 765.4430, 621.4048, |       |  | VI/Astragaloside VII                  |    |
|     |       |                                                 | [M+HCOOH-H] <sup>-</sup>                         | 0.9  | 489.3574, 471.3469, 179.0561, 161.0450, 143.0348, | 8.53  |  |                                       |    |
|     |       |                                                 |                                                  |      | 131.0344, 119.0351, 113.0238, 101.0242, 89.0237,  |       |  |                                       |    |
|     |       |                                                 |                                                  |      | 85.0288                                           |       |  |                                       |    |
| 70  |       |                                                 |                                                  |      |                                                   |       |  |                                       |    |
|     | 70    | 13.78                                           | C <sub>26</sub> H <sub>20</sub> O <sub>10</sub>  |      | 311.0563, 293.0449, 265.0449, 197.0462, 179.0343, |       |  | Salvianolic acid C*                   | SM |
|     |       |                                                 | 491.0981 [M-H] <sup>-</sup>                      | -0.5 | 135.0444, 109.0289                                | 4.21  |  |                                       |    |
|     |       |                                                 |                                                  |      |                                                   |       |  |                                       |    |
| 71  |       |                                                 |                                                  |      |                                                   |       |  |                                       |    |
|     | 71a   | 14.04                                           | C <sub>11</sub> H <sub>18</sub> O <sub>4</sub> S |      | 231.0803, 188.0140, 172.9895, 147.0448, 130.0870, |       |  | 5-Ethyl-2-pentylfuran-3-sulfonic acid | PA |
|     |       |                                                 | 245.0836 [M-H] <sup>-</sup>                      | -3.9 | 116.0711, 109.0282, 79.9573                       | 2.51  |  |                                       |    |

|    |     |       |                                                  |                                    |     |                                                                                                                                                  |       |                                                                                                                                                            |    |
|----|-----|-------|--------------------------------------------------|------------------------------------|-----|--------------------------------------------------------------------------------------------------------------------------------------------------|-------|------------------------------------------------------------------------------------------------------------------------------------------------------------|----|
|    | 71b | 14.06 | C <sub>38</sub> H <sub>34</sub> O <sub>16</sub>  | 745.1776 [M-H] <sup>-</sup>        | 0.3 | 547.1244, 519.0937, 339.0507, 321.0396, 313.0707,<br>295.0601, 277.0516, 267.0651, 249.0551, 197.0454,<br>185.0244, 179.0342, 135.0446, 109.0286 | 6.16  | Dimethyl lithospermate B                                                                                                                                   | SM |
| 72 |     |       |                                                  | 785.472 [M+H] <sup>+</sup> ,       | 0.4 | 455.3520, 437.3414                                                                                                                               | 10.69 |                                                                                                                                                            |    |
|    | 72a | 14.1  | C <sub>41</sub> H <sub>68</sub> O <sub>14</sub>  | 807.4481 [M+Na] <sup>+</sup>       |     |                                                                                                                                                  |       | Isoastragaloside IV                                                                                                                                        | AM |
|    |     |       |                                                  | 829.4601 [M+HCOOH-H] <sup>-</sup>  | 1.2 | 783.4546, 621.3969, 489.3604                                                                                                                     | 7.56  |                                                                                                                                                            |    |
|    | 72b | 14.1  | C <sub>19</sub> H <sub>16</sub> O <sub>5</sub>   | 325.1072 [M+H] <sup>+</sup>        | 0.5 | 281.1160, 263.1065, 251.1079, 211.0376, 183.0428,<br>167.0844                                                                                    | 4.08  | Tanshinonic acid                                                                                                                                           | SM |
| 73 |     |       |                                                  |                                    | 0.2 |                                                                                                                                                  |       | 5-Ethyl-2-(1-hydroxyhexyl) furan-3-<br>sulfonic acid isomer III                                                                                            | PA |
|    | 73a | 14.37 | C <sub>12</sub> H <sub>20</sub> O <sub>5</sub> S | 275.0948 [M-H] <sup>-</sup>        |     | 233.1164, 195.1394, 80.9657, 79.9540                                                                                                             | 2.73  |                                                                                                                                                            |    |
|    |     |       |                                                  | 989.5306 [M+H] <sup>+</sup> ,      | 0.2 | 455.3478, 437.3414, 419.3308, 401.3181                                                                                                           | 12.63 |                                                                                                                                                            |    |
|    | 73b | 14.41 | C <sub>49</sub> H <sub>80</sub> O <sub>20</sub>  | 1011.5123 [M+Na] <sup>+</sup>      |     |                                                                                                                                                  |       | Agroastragaloside IV                                                                                                                                       | AM |
|    |     |       |                                                  | 1033.5244 [M+HCOOH-H] <sup>-</sup> | 1.8 | 945.5092, 927.4963, 783.4619, 765.4452, 655.3764,<br>143.0357, 113.0237, 101.0226, 71.0119                                                       | 9.28  |                                                                                                                                                            |    |
|    | 73c | 14.46 | C <sub>19</sub> H <sub>20</sub> O <sub>4</sub>   | 313.1443 [M+H] <sup>+</sup>        | 2.7 | 285.1422, 269.1537, 253.0852, 249.1266, 239.1076,<br>199.0752, 171.0807, 157.1013, 143.0882, 129.0227                                            | 4.1   | 17-Hydroxycryptotanshinone                                                                                                                                 | SM |
| 74 |     |       |                                                  | 785.472 [M+H] <sup>+</sup> ,       | 0.4 | 455.3520, 437.3414                                                                                                                               | 9.99  |                                                                                                                                                            |    |
|    | 74a | 14.53 | C <sub>41</sub> H <sub>68</sub> O <sub>14</sub>  | 807.4481 [M+Na] <sup>+</sup>       |     |                                                                                                                                                  |       | Astragaloside IV isomer                                                                                                                                    | AM |
|    |     |       |                                                  | 829.4602 [M+HCOOH-H] <sup>-</sup>  | 1.2 | 783.4546, 621.3969, 489.3604                                                                                                                     | 7.24  |                                                                                                                                                            |    |
|    |     |       |                                                  | 989.5317 [M+H] <sup>+</sup> ,      | 0.5 | 473.3616, 455.3519, 437.3403, 419.3301, 401.3196<br>1011.5133 [M+Na] <sup>+</sup>                                                                | -     | β-D-Glucopyranoside, (3β,20S)-3-[[4-O-<br>(2-O-acetyl-6-deoxy-3-O-methyl-β-D-<br>galactopyranosyl)-2,6-dideoxy-3-O-<br>methyl-α-D-ribo-hexopyranosyl] oxy] | AM |
|    | 74b | 14.59 | C <sub>49</sub> H <sub>80</sub> O <sub>20</sub>  | 1033.5238 [M+HCOOH-H] <sup>-</sup> | 1.2 | 987.5135, 945.5042, 927.4931, 783.4768, 765.4352,<br>486.0766, 113.0232                                                                          | -     | pregn-5-en-20-yl 6-O-β-D-<br>glucopyranosyl-                                                                                                               |    |

|    |     |       |                                                  |                                                                |      |                                                                                                                           |       |  |                                                       |    |
|----|-----|-------|--------------------------------------------------|----------------------------------------------------------------|------|---------------------------------------------------------------------------------------------------------------------------|-------|--|-------------------------------------------------------|----|
| 75 |     |       |                                                  | 947.5199 [M+H] <sup>+</sup> ,<br>969.5024 [M+Na] <sup>+</sup>  | -0.6 | 455.3520, 419.3308, 437.3415, 143.1070                                                                                    | -     |  |                                                       |    |
|    | 75  | 14.67 | C <sub>47</sub> H <sub>78</sub> O <sub>19</sub>  |                                                                |      | 945.5079, 783.4555, 765.4380, 651.4090, 621.3974,<br>991.5178 [M+HCOOH-H] <sup>-</sup>                                    | 9.75  |  | Astragaloside V/Astragaloside<br>VI/Astragaloside VII | AM |
|    |     |       |                                                  |                                                                |      | 143.0346, 113.0265, 101.0244, 89.0239                                                                                     |       |  |                                                       |    |
| 76 |     |       |                                                  | 989.5317 [M+H] <sup>+</sup> ,<br>1011.5133 [M+Na] <sup>+</sup> | 0.5  | 473.3616, 455.3519, 437.3403, 419.3301, 401.3196                                                                          | -     |  |                                                       |    |
|    | 76  | 14.86 | C <sub>49</sub> H <sub>80</sub> O <sub>20</sub>  |                                                                |      | 987.5135, 945.5042, 927.4931, 783.4768, 765.4352,<br>1033.5238 [M+HCOOH-H] <sup>-</sup>                                   | -     |  | Clethroidoside B                                      | AM |
|    |     |       |                                                  |                                                                |      | 486.0765, 113.0232                                                                                                        |       |  |                                                       |    |
| 77 |     |       |                                                  | 205.0858 [M-H] <sup>-</sup>                                    | -4.9 | 177.0930, 161.0976, 148.0159, 132.0578, 120.0211,<br>92.0284                                                              | 2.12  |  | 6,7-Epoxygustilide                                    | LC |
|    | 77a | 15.13 | C <sub>12</sub> H <sub>14</sub> O <sub>3</sub>   |                                                                |      |                                                                                                                           |       |  |                                                       |    |
|    |     |       |                                                  | 785.4662 [M+H] <sup>+</sup> ,<br>807.4538 [M+Na] <sup>+</sup>  | -1.1 | 473.3629, 455.3534, 437.3421, 419.3297                                                                                    | 11.66 |  |                                                       |    |
|    | 77b | 15.14 | C <sub>41</sub> H <sub>68</sub> O <sub>14</sub>  |                                                                |      | 783.4526, 621.4000, 489.3612, 179.0559, 161.0465,<br>829.4603 [M+HCOOH-H] <sup>-</sup>                                    | 8.18  |  | Astragaloside IV*                                     | AM |
|    |     |       |                                                  |                                                                |      | 113.0239, 101.0245                                                                                                        |       |  |                                                       |    |
| 78 |     |       |                                                  | 189.0919 [M+H] <sup>+</sup>                                    | 0.4  | 171.0816, 161.0966, 153.0691, 147.0446, 143.0853,<br>133.0285, 128.0623, 117.0703, 105.0324, 91.0533,<br>77.0378, 66.8947 | 2.61  |  | 3-Butylidene phthalide                                | LC |
|    | 78  | 15.22 | C <sub>12</sub> H <sub>12</sub> O <sub>2</sub>   |                                                                |      |                                                                                                                           |       |  |                                                       |    |
| 79 |     |       |                                                  | 259.1008 [M-H] <sup>-</sup>                                    | -2.1 | 244.0772, 188.0134, 172.9904, 165.1273, 109.0284,<br>79.9562                                                              | 2.69  |  | 5-ethyl-2-hexylfuran-3-sulfonic acid                  | PA |
|    | 79a | 15.25 | C <sub>12</sub> H <sub>20</sub> O <sub>4</sub> S |                                                                |      |                                                                                                                           |       |  |                                                       |    |
|    |     |       |                                                  | 785.4605 [M+H] <sup>+</sup> ,<br>807.4480 [M+Na] <sup>+</sup>  | -1.1 | 473.3630, 455.3533, 437.3421, 419.3297                                                                                    | 9.82  |  |                                                       |    |
|    | 79b | 15.26 | C <sub>41</sub> H <sub>68</sub> O <sub>14</sub>  |                                                                |      | 783.4540, 621.4002, 489.3577                                                                                              | 7.18  |  | Astragaloside III*                                    | AM |
|    |     |       |                                                  | 829.4602 [M+HCOOH-H] <sup>-</sup>                              | 0.1  |                                                                                                                           |       |  |                                                       |    |
|    | 79c | 15.26 | C <sub>12</sub> H <sub>14</sub> O <sub>3</sub>   |                                                                |      | 187.0738, 161.0972, 119.0521, 83.0480                                                                                     | 2.11  |  | (-)-3-Butyl-7-hydroxyphthalide                        | LC |
|    |     |       |                                                  | 205.0858 [M-H] <sup>-</sup>                                    | -4.7 |                                                                                                                           |       |  |                                                       |    |
| 80 |     |       |                                                  | 269.0791 [M+H] <sup>+</sup> ,<br>291.0643 [M+Na] <sup>+</sup>  | 0.3  | 254.0572, 237.0549, 226.0616, 219.0450, 213.0909,<br>137.0235, 118.0416                                                   | 3.89  |  | Formononetin*                                         | AM |
|    | 80  | 15.31 | C <sub>16</sub> H <sub>12</sub> O <sub>4</sub>   |                                                                |      |                                                                                                                           |       |  |                                                       |    |

|    |     |       |                                                 |                                   |      |                                                   |      |                                                  |    |
|----|-----|-------|-------------------------------------------------|-----------------------------------|------|---------------------------------------------------|------|--------------------------------------------------|----|
|    |     |       |                                                 |                                   |      | 252.0418, 239.0344, 223.0389, 208.0518, 195.0454, |      |                                                  |    |
|    |     |       |                                                 | 267.063 [M-H] <sup>-</sup>        | -4   | 180.0599, 167.0524, 135.0068, 132.0207, 104.0258, | 2.56 |                                                  |    |
|    |     |       |                                                 |                                   |      | 91.0176                                           |      |                                                  |    |
| 81 | 81  | 15.35 | C <sub>12</sub> H <sub>16</sub> O <sub>3</sub>  | 207.1018 [M-H] <sup>-</sup>       | -5   | 189.0916, 163.1116, 150.0318, 121.0665, 109.0667, | 2.17 | Senkyunolide K                                   | LC |
|    |     |       |                                                 |                                   |      | 85.0664                                           |      |                                                  |    |
| 82 |     |       |                                                 | 207.1016 [M+H] <sup>+</sup>       | -1.9 | 189.0897, 161.0991, 125.9851, 119.0856, 105.0329, | -    |                                                  |    |
|    | 82a | 15.75 | C <sub>12</sub> H <sub>14</sub> O <sub>3</sub>  |                                   |      | 84.9595                                           |      | (-)-3-Butyl-4-hydroxyphthalide                   | LC |
|    |     |       |                                                 | 205.0858 [M-H] <sup>-</sup>       | -3   | 191.0696, 179.1087, 161.0966, 132.0588, 106.0423, | 2.07 |                                                  |    |
|    |     |       |                                                 |                                   |      | 91.0182                                           |      |                                                  |    |
|    | 82b | 15.8  | C <sub>12</sub> H <sub>16</sub> O <sub>3</sub>  | 207.1018 [M-H] <sup>-</sup>       | -5   | 193.0838, 179.1073, 150.0318, 122.0379, 109.0281  | 2.09 | Senkyunolide G                                   | LC |
| 83 | 83a | 15.86 | C <sub>17</sub> H <sub>18</sub> O <sub>5</sub>  | 303.1229 [M+H] <sup>+</sup>       | 0.5  | 167.0705, 161.0598, 133.0650, 123.0444, 118.0416  | 3.85 | (3R)-7,2'-dihydroxy-3',4'-<br>dimethoxyisoflavan | AM |
|    |     |       |                                                 | 943.5275 [M+H] <sup>+</sup> ,     | -1.2 | 599.3944, 581.3830, 441.3733, 423.3624, 405.3518  | -    |                                                  |    |
|    | 83b | 15.88 | C <sub>48</sub> H <sub>78</sub> O <sub>18</sub> | 965.5062 [M+Na] <sup>+</sup>      |      |                                                   |      | Soyasaponin I                                    | AM |
|    |     |       |                                                 | 941.5112 [M-H] <sup>-</sup> ;     | 0.3  | 923.4984, 733.4528, 615.3895, 457.3666, 161.0469, | 9.32 |                                                  |    |
|    |     |       |                                                 | 987.518 [M+HCOOH-H] <sup>-</sup>  |      | 101.0246                                          |      |                                                  |    |
|    | 83c | 15.91 | C <sub>47</sub> H <sub>76</sub> O <sub>17</sub> | 911.5012 [M-H] <sup>-</sup> ;     | 0.2  | 749.4493, 603.3890, 585.3736, 471.3472            | 8.97 | Astragaloside -911                               | AM |
|    |     |       |                                                 | 957.5070 [M+HCOOH-H] <sup>-</sup> |      |                                                   |      |                                                  |    |
|    |     |       |                                                 | 827.4775 [M+H] <sup>+</sup> ,     | -1.5 | 473.3630, 455.3534, 437.3421, 419.3297            | 12.4 |                                                  |    |
|    | 83d | 15.92 | C <sub>43</sub> H <sub>70</sub> O <sub>15</sub> | 849.4629 [M+Na] <sup>+</sup>      |      |                                                   |      | Astragaloside II*                                | AM |
|    |     |       |                                                 |                                   |      | 825.4623, 783.4534, 765.4431, 717.4117, 663.3992, |      |                                                  |    |
|    |     |       |                                                 | 871.4694 [M+HCOOH-H] <sup>-</sup> | 0.1  | 621.3803, 603.3990, 485.3275, 179.0560, 161.0481, | 8.77 |                                                  |    |
|    |     |       |                                                 |                                   |      | 113.0237, 101.0245, 89.0248, 59.0128              |      |                                                  |    |
| 84 |     |       |                                                 | 645.3947 [M+Na] <sup>+</sup>      | -0.5 | -                                                 | 9.38 |                                                  |    |
|    | 84a | 16.13 | C <sub>35</sub> H <sub>58</sub> O <sub>9</sub>  |                                   |      |                                                   |      | Astramembrannin II                               | AM |
|    |     |       |                                                 | 667.4051 [M+HCOOH-H] <sup>-</sup> | -1.8 | 487.3                                             | 6.59 |                                                  |    |

|     |       |                                                 |                                    |      |                                                   |       |                               |    |
|-----|-------|-------------------------------------------------|------------------------------------|------|---------------------------------------------------|-------|-------------------------------|----|
| 84b | 16.16 | C <sub>17</sub> H <sub>16</sub> O <sub>5</sub>  | 301.1073 [M+H] <sup>+</sup> ,      | 0.3  | 283.0965, 269.0772, 241.0802, 191.0708, 179.0748, | 3.92  | Farrerol*                     | AM |
|     |       |                                                 | 323.0898 [M+Na] <sup>+</sup>       |      | 167.0705, 147.0443, 134.0334, 106.0427            |       |                               |    |
|     |       |                                                 | 299.0914 [M-H] <sup>-</sup>        | -3.7 | 284.0685, 269.0460                                | 2.89  |                               |    |
| 84c | 16.17 | C <sub>53</sub> H <sub>86</sub> O <sub>22</sub> | 1075.5678 [M+H] <sup>+</sup> ,     | 0.3  | 960.4933, 849.4591, 675.4072, 455.3520, 437.3414  | -     | Astrogaloside-1073B           | AM |
|     |       |                                                 | 1097.5481 [M+Na] <sup>+</sup>      |      | 911.5130, 749.4482, 603.3894, 585.3790, 471.3471, | 9.71  |                               |    |
|     |       |                                                 | 1073.5538 [M-H] <sup>-</sup> ,     | 1    | 113.0271                                          |       |                               |    |
| 85a | 16.36 | C <sub>12</sub> H <sub>12</sub> O <sub>3</sub>  | 1119.5613 [M+HCOOH-H] <sup>-</sup> | 2.3  | 187.0958, 169.0643, 159.0802, 115.0548, 91.0550,  | 2.85  | Senkyunolide E                | LC |
|     |       |                                                 | 205.0864 [M+H] <sup>+</sup>        |      | 84.9590                                           |       |                               |    |
|     |       |                                                 | 203.0703 [M-H] <sup>-</sup>        | -4.6 | 173.0240, 160.0159, 145.0282, 132.0206, 117.0333, | 2.06  |                               |    |
| 85b | 16.41 | C <sub>43</sub> H <sub>70</sub> O <sub>15</sub> | 106.0416, 92.0249                  | 0    | 473.3630, 455.3534, 437.3422, 419.3298            | 12.64 | Isoastragaloside II*          | AM |
|     |       |                                                 | 827.4775 [M+H] <sup>+</sup> ,      |      | 825.4641, 783.4651, 765.4398, 489.3498, 161.0445, | 8.79  |                               |    |
|     |       |                                                 | 849.4629 [M+Na] <sup>+</sup>       | 0.3  | 113.0237, 101.0245, 89.0248, 59.0128              |       |                               |    |
| 86a | 16.52 | C <sub>16</sub> H <sub>12</sub> O <sub>5</sub>  | 871.4695 [M+HCOOH-H] <sup>-</sup>  | 0.2  | 270.0521, 252.0385, 245.0845, 242.0529, 169.1031, | 3.5   | Wogonin*                      | AM |
|     |       |                                                 | 285.0776 [M+H] <sup>+</sup> ,      |      | 151.0534                                          |       |                               |    |
|     |       |                                                 | 307.0594 [M+Na] <sup>+</sup>       | -4.7 | 268.0373, 239.0379, 198.0313, 162.9988            | 2.59  |                               |    |
| 86b | 16.53 | C <sub>18</sub> H <sub>14</sub> O <sub>4</sub>  | 283.061 [M-H] <sup>-</sup>         | 2.2  | 277.0850, 249.0907, 221.0971, 185.0584, 165.0726  | 3.62  | 3α-Hydroxymethylenetanshinone | SM |
|     |       |                                                 | 295.0972 [M+H] <sup>+</sup> ,      |      | 295.1325, 283.1328, 267.1374, 252.1129, 237.1263, | 4.7   |                               |    |
|     |       |                                                 | 317.0791 [M+Na] <sup>+</sup>       | 1.7  | 225.0903, 197.0598, 185.0960                      |       |                               |    |
| 86c | 16.63 | C <sub>19</sub> H <sub>18</sub> O <sub>4</sub>  | 311.1283 [M+H] <sup>+</sup> ,      | 0.7  | 669.3981, 473.3630, 455.3491, 437.3422, 419.3298  | 12.66 | Trojanoside A                 | AM |
|     |       |                                                 | 333.1094 [M+Na] <sup>+</sup>       |      | 825.4641, 783.4530, 765.4433, 603.3899, 489.3608, | 8.87  |                               |    |
|     |       |                                                 | 827.4776 [M+H] <sup>+</sup> ,      | 0.3  | 161.0459, 113.0237, 101.0245, 89.0248, 59.0128    |       |                               |    |
| 87  | 16.76 | C <sub>43</sub> H <sub>70</sub> O <sub>15</sub> | 849.4631 [M+Na] <sup>+</sup>       |      |                                                   |       |                               |    |
|     |       |                                                 | 871.4695 [M+HCOOH-H] <sup>-</sup>  |      |                                                   |       |                               |    |

|    |     |       |                                                  |                                                               |      |                                                                                                       |       |                                |       |
|----|-----|-------|--------------------------------------------------|---------------------------------------------------------------|------|-------------------------------------------------------------------------------------------------------|-------|--------------------------------|-------|
| 88 |     |       |                                                  | 279.1597 [M+H] <sup>+</sup> ,<br>301.1423 [M+Na] <sup>+</sup> | 4.1  | 261.1465, 233.1523, 205.1584, 191.1078                                                                | 3.89  |                                |       |
|    | 88  | 16.82 | C <sub>16</sub> H <sub>22</sub> O <sub>4</sub>   | 277.1445 [M-H] <sup>-</sup>                                   | -3.8 | 236.1045, 221.1535, 205.1218, 177.0912, 163.1129,<br>148.0516                                         | 2.81  | Senkyunolide M/Senkyunolide Q  | LC    |
| 89 | 89a | 17.01 | C <sub>10</sub> H <sub>22</sub> O <sub>4</sub> S | 237.1170 [M-H] <sup>-</sup>                                   | -2   | 96.96, 79.9570                                                                                        | 2.55  | Decyl hydrogen sulfate         | HN    |
|    | 89b | 17.04 | C <sub>19</sub> H <sub>18</sub> O <sub>4</sub>   | 311.1285 [M+H] <sup>+</sup> ,<br>333.1103 [M+Na] <sup>+</sup> | 2.5  | 293.1179, 275.1075, 251.1059, 219.1180, 169.0650,<br>141.0699                                         | 4.72  | Tanshinone IIB                 | SM    |
| 90 | 90  | 17.15 | C <sub>19</sub> H <sub>18</sub> O <sub>4</sub>   | 333.1105 [M+Na] <sup>+</sup>                                  | 2.3  | 293.1177, 275.1063, 263.1067, 227.0721, 215.1044,<br>199.0750                                         | 4.73  | 1-keto-Isocryptotanshinone     | SM    |
| 91 | 91  | 17.27 | C <sub>10</sub> H <sub>22</sub> O <sub>4</sub> S | 237.1156 [M-H] <sup>-</sup>                                   | -4.2 | 165.0217, 96.9591, 79.9561                                                                            | 2.57  | Decyl hydrogen sulfate isomer  | HN    |
| 92 | 92a | 17.31 | C <sub>18</sub> H <sub>32</sub> O <sub>4</sub>   | 311.2216 [M-H] <sup>-</sup>                                   | -3   | 293.2123, 275.2019, 253.1831, 235.1707, 223.1703,<br>174.9544, 87.0448                                | 3.1   | (9E)-9-Octadecenedioic acid    | HN/PA |
|    | 92b | 17.33 | C <sub>45</sub> H <sub>72</sub> O <sub>16</sub>  | 869.4911 [M+H] <sup>+</sup> ,<br>891.4743 [M+Na] <sup>+</sup> | -0.2 | 873.4537, 831.4497, 689.4242, 671.4175, 653.4064,<br>473.3631, 455.3535, 437.3422, 419.3298           | 12.64 | Astragaloside I*               | AM    |
|    |     |       |                                                  | 913.483 [M+HCOOH-H] <sup>-</sup>                              | 1.5  | 825.4655, 766.4537, 487.3426                                                                          | 9.28  |                                |       |
| 93 | 93  | 17.56 | C <sub>11</sub> H <sub>10</sub> O <sub>3</sub>   | 193.1225 [M+H] <sup>+</sup>                                   | 0.9  | 175.1113, 147.1171, 137.0601, 119.0851                                                                | 2.78  | Senkyunolide A                 | LC    |
| 94 | 94a | 17.63 | C <sub>18</sub> H <sub>14</sub> O <sub>3</sub>   | 279.1003 [M+H] <sup>+</sup>                                   | -3.2 | 261.0912, 251.1033, 233.0951, 205.1011, 169.0643                                                      | 3.46  | Methylenetanshinquinone        | SM    |
|    | 94b | 17.65 | C <sub>18</sub> H <sub>16</sub> O <sub>4</sub>   | 297.1121 [M+H] <sup>+</sup> ,<br>319.0949 [M+Na] <sup>+</sup> | 2.6  | 205.1021, 189.0704, 165.0703                                                                          | 3.75  | Tanshinol B                    | SM    |
| 95 |     |       |                                                  | 869.4912 [M+H] <sup>+</sup> ,<br>891.4744 [M+Na] <sup>+</sup> | 0    | 689.4269, 671.4175, 653.4086, 473.3542, 455.2007,<br>437.3422, 419.3298                               | 13.06 | Isoastragaloside I             | AM    |
|    | 95  | 17.73 | C <sub>45</sub> H <sub>72</sub> O <sub>16</sub>  | 913.4798 [M+HCOOH-H] <sup>-</sup>                             | 1.7  | 869.4809, 827.4778, 809.4560                                                                          | 9.41  |                                |       |
| 96 | 96  | 17.83 | C <sub>20</sub> H <sub>20</sub> O <sub>5</sub>   | 341.1373 [M+H] <sup>+</sup> ,<br>363.1205 [M+Na] <sup>+</sup> | 0.7  | 323.1278, 309.1154, 295.1314, 281.1160, 263.1065,<br>253.0887, 235.1114, 220.0875, 207.1169, 192.0921 | 4.4   | Trijuganone C                  | SM    |
| 97 | 97a | 18.02 | C <sub>11</sub> H <sub>24</sub> O <sub>4</sub> S | 251.1313 [M-H] <sup>-</sup>                                   | 0.6  | 165.0244, 96.9602, 79.9570                                                                            | 2.65  | Undecyl sulfuric acid isomer I | HN    |



|     |       |                                                   |                                                  |                               |                                                                                            |                                                               |                                                                             |                                 |    |
|-----|-------|---------------------------------------------------|--------------------------------------------------|-------------------------------|--------------------------------------------------------------------------------------------|---------------------------------------------------------------|-----------------------------------------------------------------------------|---------------------------------|----|
| 97b | 18.06 | C <sub>30</sub> H <sub>50</sub> O <sub>5</sub>    | 513.3556 [M+Na] <sup>+</sup>                     | 1.1                           | 473.3620, 455.3517, 437.3411, 419.3307                                                     | 7                                                             | Cyclosieversigenin*                                                         | AM                              |    |
| 97c | 18.1  | C <sub>19</sub> H <sub>22</sub> O <sub>4</sub>    | 313.1439 [M-H] <sup>-</sup>                      | -2.2                          | 285.1503, 269.1549, 241.1591, 226.0996, 213.1284,<br>198.1057, 185.0961, 171.0831          | 3.27                                                          | Tanshinone V                                                                | SM                              |    |
|     |       |                                                   | 542.3246 [M+H] <sup>+</sup>                      | 0.4                           | 524.3135, 376.9124, 184.0731, 104.1069, 86.0962                                            | 7.36                                                          | (2R)-3-Hydroxy-2-[(5Z,8Z,11Z,14Z,17Z)-<br>5,8,11,14,17-icosapentaenoxyloxy] | HN                              |    |
| 97d | 18.12 | C <sub>28</sub> H <sub>48</sub> NO <sub>7</sub> P | 586.3151 [M+HCOOH-H] <sup>-</sup>                | 0.1                           | 526.2928, 301.2165, 257.2295, 224.0670, 168.0429                                           | 5.70                                                          | propyl 2-(trimethylammonio) ethyl<br>phosphate                              | HN                              |    |
| 98  |       |                                                   | 542.3246 [M+H] <sup>+</sup>                      | 0.4                           | 524.3135, 258.1097, 184.0731, 166.0583, 124.9999,<br>104.1073, 86.0962, 60.0791            | 7.23                                                          |                                                                             |                                 |    |
| 98a | 18.33 | C <sub>28</sub> H <sub>48</sub> NO <sub>7</sub> P | 586.3153 [M+HCOOH-H] <sup>-</sup>                | 0.4                           | 526.2934, 301.2164, 257.2242, 242.0802, 224.0673,<br>203.1779, 168.0429, 152.9941, 78.9581 | 5.71                                                          | LysoPC 20:5                                                                 | HN                              |    |
| 98b | 18.33 | C <sub>26</sub> H <sub>48</sub> NO <sub>7</sub> P | 518.3247 [M+H] <sup>+</sup>                      | 0                             | 184.0731, 104.1069, 86.0955                                                                | 7.03                                                          |                                                                             |                                 |    |
|     |       |                                                   | 562.3142 [M+HCOOH-H] <sup>-</sup>                | 0.5                           | 502.2906, 277.2165, 224.0674, 152.9948                                                     | 5.54                                                          | Lysophosphatidylcholine (18:3)                                              | HN                              |    |
| 99  |       |                                                   | 869.4914 [M+H] <sup>+</sup> ,                    | 0.3                           | 689.4249, 671.4148, 653.4043, 635.3910, 473.3614,                                          | 13.51                                                         |                                                                             |                                 |    |
| 99  | 18.38 | C <sub>45</sub> H <sub>72</sub> O <sub>16</sub>   | 891.4746 [M+Na] <sup>+</sup>                     |                               | 455.3517, 437.3412, 419.3305, 401.3214                                                     |                                                               | Astragaloside I isomer                                                      | AM                              |    |
|     |       |                                                   | 867.4747 [M-H] <sup>-</sup> ;                    | 1.7                           | 825.4658, 469.0039, 179.0563, 161.0447, 119.0353,                                          | 9.48                                                          |                                                                             |                                 |    |
|     |       |                                                   | 913.483 [M+HCOOH-H] <sup>-</sup>                 |                               | 101.0241, 89.0240, 71.0134, 59.0135                                                        |                                                               |                                                                             |                                 |    |
| 100 | 100   | 18.45                                             | C <sub>11</sub> H <sub>24</sub> O <sub>4</sub> S | 251.1313 [M-H] <sup>-</sup>   | 1.3                                                                                        | 96.9592, 79.9562                                              | 2.68                                                                        | Undecyl sulfuric acid           | HN |
| 101 | 101   | 18.58                                             | C <sub>11</sub> H <sub>24</sub> O <sub>4</sub> S | 251.1313 [M-H] <sup>-</sup>   | 1.3                                                                                        | 165.0244, 96.9594, 79.9562                                    | 2.7                                                                         | Undecyl sulfuric acid isomer II | HN |
| 102 | 102a  | 18.63                                             | C <sub>18</sub> H <sub>14</sub> O <sub>3</sub>   | 279.102 [M+H] <sup>+</sup> ,  | 1.1                                                                                        | 261.0903, 251.1033, 233.0951, 205.1011, 169.0643,             | 3.3                                                                         | Dihydrotanshinone I             | SM |
|     | a     |                                                   | 301.0837 [M+Na] <sup>+</sup>                     |                               | 141.0701                                                                                   |                                                               |                                                                             |                                 |    |
|     | 102b  | 18.72                                             | C <sub>18</sub> H <sub>16</sub> O <sub>3</sub>   | 281.1173 [M+H] <sup>+</sup>   | 0.4                                                                                        | 263.1067, 252.0772, 235.1113, 220.0854, 207.1167,<br>192.0935 | 3.51                                                                        | Neotanshinone B                 | SM |
| 103 | 103a  | 18.95                                             | C <sub>18</sub> H <sub>14</sub> O <sub>3</sub>   | 279.0952 [M+H] <sup>+</sup> , | -1.6                                                                                       | 187.1                                                         | 3.42                                                                        | 1,2-Dihydrotanshinone I*        | SM |
|     |       |                                                   | 301.0833 [M+Na] <sup>+</sup>                     |                               |                                                                                            |                                                               |                                                                             |                                 |    |

|      |       |                                                   |                                   |      |                                                    |      |                                         |    |
|------|-------|---------------------------------------------------|-----------------------------------|------|----------------------------------------------------|------|-----------------------------------------|----|
|      |       |                                                   | 480.3445 [M+H] <sup>+</sup>       | -0.7 | 462.3284,299.2610,184.0733,166.0362,124.9999,      | 7.15 | (R, E)-3-(hexadec-9-en-1-yloxy)-2-      |    |
| 103b | 18.95 | C <sub>24</sub> H <sub>50</sub> NO <sub>6</sub> P |                                   |      | 104.1068, 86.0961, 71.0710, 60.0796                |      | hydroxypropyl (2-(trimethylammonio)     | HN |
|      |       |                                                   | 524.3362 [M+HCOOH-H] <sup>-</sup> | 0.1  | 464.3144,393.2404,375.2300,326.2785,241.2165,      | 5.35 | ethyl) phosphate                        |    |
|      |       |                                                   |                                   |      | 224.0687, 168.0423, 78.9582                        |      |                                         |    |
|      |       |                                                   | 544.3383 [M+H] <sup>+</sup>       | -0.9 | 353.2743, 184.0731, 125.0007, 86.0952              | 7.54 | 3-Hydroxy-2-[(5Z,8Z,11Z,14Z)-5,8,11,14- |    |
| 103c | 18.96 | C <sub>28</sub> H <sub>50</sub> NO <sub>7</sub> P |                                   |      |                                                    |      | icosatetraenoyloxy] propyl 2-           | HN |
|      |       |                                                   | 588.3343 [M+HCOOH-H] <sup>-</sup> | -1.7 | 528.3124, 303.2324, 259.2443, 242.0791             | 5.78 | (trimethylammonio) ethyl phosphate      |    |
|      |       |                                                   |                                   |      |                                                    |      |                                         |    |
|      |       |                                                   | 520.3392 [M+H] <sup>+</sup>       | -1.1 | 502.3280, 365.3524, 184.0743, 166.0647, 124.9999,  | 7.37 |                                         |    |
| 103d | 18.96 | C <sub>26</sub> H <sub>50</sub> NO <sub>7</sub> P |                                   |      | 104.1067, 86.0965                                  |      | 2-linoleoyl-sn-glycero-3-phosphocholine | HN |
|      |       |                                                   | 564.3297 [M+HCOOH-H] <sup>-</sup> | -1.5 | 504.3088, 279.2320, 242.0800, 224.0680, 168.0417,  | 5.58 |                                         |    |
|      |       |                                                   |                                   |      | 152.9942, 78.9582                                  |      |                                         |    |
| 104  |       |                                                   | 299.2011 [M+H] <sup>+</sup>       | 0.1  | 187.0759, 159.0808                                 | 4.22 |                                         |    |
| 104  | 19.05 | C <sub>20</sub> H <sub>26</sub> O <sub>2</sub>    |                                   |      |                                                    |      | 5,6-Dehydrosugiol                       | SM |
|      |       |                                                   | 297.1854 [M-H] <sup>-</sup>       | 1.9  | 282.1616, 267.1354                                 | 3.14 |                                         |    |
| 105  |       |                                                   |                                   |      | 285.27881, 240.0995, 184.0732, 181.0260, 166.0628, | 7.25 |                                         |    |
|      |       |                                                   | 468.3449 [M+H] <sup>+</sup>       | 0.3  | 124.9998, 104.1070, 86.09661, 71.073               |      | 3-hydroxy-2-(pentadecyloxy)propyl       | HN |
| 105a | 19.11 | C <sub>23</sub> H <sub>50</sub> NO <sub>6</sub> P |                                   |      |                                                    |      | (2-(trimethylammonio)ethyl) phosphate   |    |
|      |       |                                                   | 512.3349 [M+HCOOH-H] <sup>-</sup> | 0.1  | 452.3159, 407.2548, 381.2396, 363.2292, 224.0694,  | 5.31 |                                         |    |
|      |       |                                                   |                                   |      | 168.0421, 78.9578                                  |      |                                         |    |
|      |       |                                                   | 315.1597 [M+H] <sup>+</sup> ,     |      |                                                    |      |                                         |    |
| 105b | 19.12 | C <sub>19</sub> H <sub>22</sub> O <sub>4</sub>    |                                   | 2.1  | 297.1480, 279.1378, 251.1423, 215.1052, 183.0829   | 4.22 | Neocryptotanshinone                     | SM |
|      |       |                                                   | 339.1419 [M+Na] <sup>+</sup>      |      |                                                    |      |                                         |    |
|      |       |                                                   | 313.1439 [M-H] <sup>-</sup>       | -2.1 | 295.1328, 283.1331, 267.1383, 255.1387             | 3.11 |                                         |    |
| 106  |       |                                                   |                                   |      | 311.1237, 279.1022, 261.0917, 233.0951, 205.1018,  | 4.25 | Methyl tanshinonate                     | SM |
| 106a | 19.31 | C <sub>20</sub> H <sub>18</sub> O <sub>5</sub>    |                                   | -0.5 | 190.0786                                           |      |                                         |    |
|      |       |                                                   |                                   |      | 450.3340, 391.2608, 365.2468, 285.2792,240.0999,   |      | (2R)-2-Hydroxy-3-(pentadecyloxy)        |    |
| 106b | 19.32 | C <sub>23</sub> H <sub>50</sub> NO <sub>6</sub> P |                                   | 0    | 184.0732, 181.0269, 166.0627, 155.0131, 124.9997,  | 7.25 | propyl 2-(trimethylammonio) ethyl       | HN |
|      |       |                                                   | 468.3450 [M+H] <sup>+</sup>       |      |                                                    |      | phosphate                               |    |
|      |       |                                                   |                                   |      | 104.1069, 86.0966, 71.0732, 60.0802                |      |                                         |    |

|     |      |       |                                                   |                                                               |      |                                                                                                                                                 |       |                                             |    |
|-----|------|-------|---------------------------------------------------|---------------------------------------------------------------|------|-------------------------------------------------------------------------------------------------------------------------------------------------|-------|---------------------------------------------|----|
|     |      |       |                                                   | 512.3356 [M+HCOOH-H] <sup>-</sup>                             | 1.5  | 452.3143, 438.29734, 381.2396, 363.2292, 224.0684, 168.0420, 78.9582                                                                            | 5.32  |                                             |    |
| 107 | 107  | 19.35 | C <sub>19</sub> H <sub>18</sub> O <sub>3</sub>    | 295.135 [M+H] <sup>+</sup> ,<br>317.1150 [M+Na] <sup>+</sup>  | 1.4  | 280.1099, 262.0976, 242.1261, 234.1029, 219.0799,<br>191.0850, 178.0774, 165.0694, 152.0614, 141.0699,<br>128.0614, 115.0537, 91.0537           | 3.82  | Isotanshinone IIA                           | SM |
| 108 | 108a | 19.49 | C <sub>47</sub> H <sub>74</sub> O <sub>17</sub>   | 911.501 [M+H] <sup>+</sup> ,<br>933.4825 [M+Na] <sup>+</sup>  | 0.7  | 731.4326, 713.4281, 695.4151, 677.4075, 455.3480,<br>437.3443, 419.3341, 401.3195                                                               | -     | Acetyl astragaloside I                      | AM |
|     |      |       |                                                   | 955.4921 [M+HCCOH-H] <sup>-</sup>                             | 1.4  | 909.46632, 515.3358                                                                                                                             | 10.03 |                                             |    |
|     | 108b | 19.50 | C <sub>26</sub> H <sub>52</sub> NO <sub>6</sub> P | 506.3598 [M+H] <sup>+</sup>                                   | -2.3 | 491.3385, 184.0727, 166.0637, 124.9999, 104.1071,<br>86.0942                                                                                    | 7.29  | Lysophosphatidylcholine (18:1)              | HN |
|     |      |       |                                                   | 550.3501 [M+HCOOH-H] <sup>-</sup>                             | 0.4  | 490.3300, 419.2556, 401.2418, 293.1228, 267.2322,<br>236.1038, 224.0698, 168.0422, 152.9971, 78.9581                                            | 5.54  |                                             |    |
| 109 | 109  | 19.68 | C <sub>19</sub> H <sub>24</sub> O <sub>3</sub>    | 301.1801 [M+H] <sup>+</sup>                                   | 0.9  | 271.1697, 256.1460, 241.1225, 227.1072, 215.1053,<br>203.1061, 187.0749, 177.0909, 165.0694, 152.0614,<br>141.0700, 128.0617, 115.0541, 91.0537 | 4.04  | Miltipolone                                 | SM |
| 110 | 110  | 19.96 | C <sub>26</sub> H <sub>52</sub> NO <sub>7</sub> P | 522.3556 [M+H] <sup>+</sup>                                   | 0.2  | 504.3511, 337.2738, 184.0730, 124.9999, 86.0965                                                                                                 | 7.70  | 2-Oleoyl-sn-glycero-3-<br>phosphorylcholine | HN |
|     |      |       |                                                   | 566.3475 [M+HCOOH-H] <sup>-</sup>                             | -0.2 | 506.3257, 281.3487, 242.0780, 224.0690, 152.9973                                                                                                | 5.70  |                                             |    |
| 111 | 111  | 20.05 | C <sub>24</sub> H <sub>52</sub> NO <sub>6</sub> P | 482.3612 [M+H] <sup>+</sup>                                   | -0.4 | 464.3495, 278.2830, 184.0731, 166.0626,<br>146.9820, 124.9997, 104.1068, 86.0967, 60.0802                                                       | 7.50  | Phosphatidylcholinelyso alkyl 16:0          | HN |
|     |      |       |                                                   | 526.3535 [M+HCOOH-H] <sup>-</sup>                             | 3.3  | 466.3289, 281.2485, 242.0773, 224.0668, 168.0419,<br>152.9945, 146.9636                                                                         | 5.45  |                                             |    |
| 112 | 112  | 20.17 | C <sub>18</sub> H <sub>12</sub> O <sub>3</sub>    | 277.0859 [M+H] <sup>+</sup> ,<br>299.0683 [M+Na] <sup>+</sup> | 1.3  | 249.0913, 221.0599, 207.0803, 193.1012, 178.0775,<br>141.0708                                                                                   | 3.27  | Tanshinone I*                               | SM |
| 113 | 113  | 20.18 | C <sub>25</sub> H <sub>52</sub> NO <sub>6</sub> P | 494.3603 [M+H] <sup>+</sup>                                   | -0.4 | 476.3402, 311.2588, 285.0133, 184.0729, 166.0620,<br>124.9999, 104.1069, 98.9835, 86.0960, 60.0794                                              | 7.56  |                                             | HN |

|     |      |       |                                                   |                                                                  |              |                                                                                                                                                            |              |                                                                                                |    |
|-----|------|-------|---------------------------------------------------|------------------------------------------------------------------|--------------|------------------------------------------------------------------------------------------------------------------------------------------------------------|--------------|------------------------------------------------------------------------------------------------|----|
|     |      |       |                                                   | 538.3517 [M+HCOOH-H] <sup>-</sup>                                | -0.8         | 478.3304, 407.2572, 389.2456, 377.2445, 224.0675,<br>168.0424, 152.9936, 136.9989, 96.9693, 78.9581                                                        | -            | (2R)-3-[(1Z)-1-Heptadecen-1-yloxy]-2-<br>hydroxypropyl 2-(trimethylammonio)<br>ethyl phosphate |    |
| 114 | 114a | 20.21 | C <sub>19</sub> H <sub>20</sub> O <sub>3</sub>    | 297.1491 [M+H] <sup>+</sup> ,<br>319.1295 [M+Na] <sup>+</sup>    | 1.2          | 282.1253, 279.1379, 271.1690, 267.10211, 241.1218,<br>221.0951, 207.0800, 193.1005, 178.0778, 165.0701,<br>153.0694, 141.0702, 128.0617, 115.0541, 91.0538 | 2.98         | Isocryptotanshinone                                                                            | SM |
|     | 114b | 20.21 | C <sub>18</sub> H <sub>12</sub> O <sub>4</sub>    | 293.08 [M+H] <sup>+</sup>                                        | -0.2         | 265.0875, 209.0957, 194.0730, 191.0862, 165.0702                                                                                                           | -            | Monohydroxytanshinone I                                                                        | SM |
| 115 | 115a | 20.25 | C <sub>26</sub> H <sub>52</sub> NO <sub>7</sub> P | 522.3546 [M+H] <sup>+</sup><br>566.3459 [M+HCOOH-H] <sup>-</sup> | 0.2<br>-0.2  | 504.3451, 184.0737, 124.9980, 104.1062, 86.0954<br>506.3243, 281.3488, 224.0714                                                                            | 7.62<br>5.74 | Oleoyl-lysophosphatidylcholine                                                                 | HN |
|     | 115b | 20.25 | C <sub>24</sub> H <sub>52</sub> NO <sub>6</sub> P | 482.3612 [M+H] <sup>+</sup><br>526.3676 [M+HCOOH-H] <sup>-</sup> | -0.4<br>0.1  | 464.3483, 359.1905, 245.14445, 184.0731, 166.0629,<br>124.9999, 104.1069, 86.09685, 60.0795<br>466.3302, 395.2563, 377.2459, 168.0423, 78.9581             | 7.48<br>5.47 | Lysophosphatidylcholine O-16:0/0:0                                                             | HN |
| 116 | 116  | 20.26 | C <sub>20</sub> H <sub>28</sub> O <sub>2</sub>    | 301.2 [M+H] <sup>+</sup><br>299.2 [M-H] <sup>-</sup>             | 0.7<br>-3.5  | 259.1700, 213.1282<br>285.1547, 269.1530, 227.1079, 213.0148, 197.9926,                                                                                    | 4.33<br>3.15 | Sugiol                                                                                         | SM |
| 117 | 117  | 20.53 | C <sub>28</sub> H <sub>54</sub> NO <sub>7</sub> P | 548.3705 [M+H] <sup>+</sup><br>592.3614 [M+HCOOH-H] <sup>-</sup> | -1.1<br>-0.3 | 530.3638, 264.2670, 184.0731, 166.0583, 124.9999,<br>104.1073, 86.0962, 60.0791<br>532.3408, 307.2635, 242.0746, 224.0670, 152.9970,<br>116.9278, 78.9576  | 7.79<br>-    | 2-Eicosadienoyl-sn-glycero-3-<br>phosphocholine                                                | HN |
| 118 | 118a | 20.63 | C <sub>19</sub> H <sub>20</sub> O <sub>4</sub>    | 313.1444 [M+H] <sup>+</sup>                                      | 2            | 295.1329, 267.1061, 254.0938, 251.1430, 241.1223,<br>169.1012                                                                                              | 4.11         | 1,2,6,7,8,9-Hexahydro-1,6,6-trimethyl-<br>3,11-dioxanaphtho[2,1-e]azulene-10,12-<br>dione      | SM |
|     | 118b | 20.65 | C <sub>24</sub> H <sub>30</sub> O <sub>4</sub>    | 405.2042 [M+Na] <sup>+</sup>                                     | 1.4          | 253.1062, 191.1073, 175.1117, 147.1182, 105.0695,<br>91.0532                                                                                               | 5.41         | Senkyunolide P                                                                                 | LC |
| 119 | 119  | 20.79 | C <sub>28</sub> H <sub>54</sub> NO <sub>7</sub> P | 548.3711 [M+H] <sup>+</sup>                                      | 0            | 530.3638, 264.2670, 184.0731, 166.0583, 124.9999,<br>104.1073, 86.0962, 60.0791                                                                            | 7.76         | Lysophosphatidylcholine (20:2)                                                                 | HN |

|     |     |       |                                                   |                                   |      |                                                                                                                 |      |                                                    |    |
|-----|-----|-------|---------------------------------------------------|-----------------------------------|------|-----------------------------------------------------------------------------------------------------------------|------|----------------------------------------------------|----|
|     |     |       |                                                   | 592.3615 [M+HCOOH-H] <sup>-</sup> | -0.4 | 532.3408, 307.2635, 242.0746, 224.0670, 152.9970,<br>116.9278, 78.9576                                          | 5.61 |                                                    |    |
| 120 | 120 | 21.13 | C <sub>17</sub> H <sub>12</sub> O <sub>3</sub>    | 265.0866 [M+H] <sup>+</sup>       | 2.7  | 237.0910, 209.0961, 181.0648                                                                                    | 3.29 | Tanshinlactone                                     | SM |
|     |     |       |                                                   | 309.0765 [M+HCOOH-H] <sup>-</sup> | -2.8 | 235.0792, 223.0741, 221.0972                                                                                    | -    |                                                    |    |
| 121 | 121 | 21.49 | C <sub>24</sub> H <sub>28</sub> O <sub>4</sub>    | 381.2068 [M+H] <sup>+</sup> ,     | 1.2  | 385.1661, 365.1109, 347.2213, 321.2133, 261.0388,<br>403.1884 [M+Na] <sup>+</sup>                               | 5.06 | Levistolide A*                                     | LC |
| 122 |     |       |                                                   | 524.3709 [M+H] <sup>+</sup>       | -0.8 | 506.3579, 483.1754, 341.3075, 258.1137, 184.0733,<br>166.0583, 124.9999, 104.1073, 86.0962, 60.0791             | 7.9  |                                                    |    |
|     | 122 | 21.65 | C <sub>26</sub> H <sub>54</sub> NO <sub>7</sub> P | 568.3620 [M+HCOOH-H] <sup>-</sup> | 0    | 508.3394, 283.2628, 242.0770, 224.0668, 152.9950,<br>116.9284, 78.9585                                          | 5.86 | 1-Stearoyl-lysophosphatidylcholine                 | HN |
| 123 | 123 | 21.76 | C <sub>19</sub> H <sub>18</sub> O <sub>3</sub>    | 295.1326 [M+H] <sup>+</sup>       | -1   | 280.1099, 277.1218, 262.0997, 249.1285, 234.1023,<br>219.0804                                                   | 3.87 | Tanshinone IIA*                                    | SM |
| 124 |     |       |                                                   | 283.1695 [M+H] <sup>+</sup> ,     | 0.1  | 265.1585, 240.1142, 223.1115, 207.0809, 195.1161,<br>305.1512 [M+Na] <sup>+</sup>                               | 4.79 | Miltirone                                          | SM |
| 125 |     |       |                                                   | 269.1538 [M+H] <sup>+</sup>       | 0.9  | 178.0776, 165.0700, 152.0619, 128.0615, 115.0538,<br>91.0535, 69.0363                                           | 3.66 | Salviolone                                         | SM |
| 126 |     |       |                                                   | 510.4 [M+H] <sup>+</sup>          | -0.4 | 492.3812, 468.3211, 368.3230, 327.2879, 184.0731,<br>166.0608, 124.9999, 104.1068, 98.9844, 86.0956,<br>60.0799 | 7.97 |                                                    |    |
|     | 126 | 22.29 | C <sub>26</sub> H <sub>56</sub> NO <sub>6</sub> P | 554.3829 [M+HCOOH-H] <sup>-</sup> | -0.3 | 494.3615, 473.2866, 449.2999, 423.2872, 405.2771,<br>224.067, 168.0422, 78.9580                                 | 5.79 | Lyso-PAF C-18                                      | HN |
| 127 | 127 | 22.32 | C <sub>28</sub> H <sub>56</sub> NO <sub>7</sub> P | 550.3863 [M+H] <sup>+</sup>       | -0.7 | 532.3757, 473.3063, 367.3164, 258.1073, 184.0734,<br>166.0630, 124.9999, 104.1067, 86.0956                      | 8.21 | 1-O-(13'Z-Eicosaenoyl)-sn-glycero-3-phosphocholine | HN |

|     |     |       |                                                |                                   |      |                                                                                  |      |                                                |       |
|-----|-----|-------|------------------------------------------------|-----------------------------------|------|----------------------------------------------------------------------------------|------|------------------------------------------------|-------|
|     |     |       |                                                | 594.3767 [M+HCOOH-H] <sup>-</sup> | -1.6 | 534.3554, 309.2794, 281.2478, 242.0813, 224.0689,<br>168.0420, 152.9964, 78.9580 | 6.07 |                                                |       |
| 128 | 128 | 22.88 | C <sub>20</sub> H <sub>30</sub> O <sub>2</sub> | 301.2189 [M-H] <sup>-</sup>       | 4.5  | 283.2067, 257.2278, 229.1953, 203.1815,                                          | 3.32 | Eicosapentanoic acid                           | PA    |
| 129 | 129 | 23.03 | C <sub>18</sub> H <sub>30</sub> O <sub>2</sub> | 277.2176 [M-H] <sup>-</sup>       | 1.08 | 264.0779, 251.1067, 199.8477                                                     | -    | 8,12,15-Octadecatrienoic acid,<br>(8E,12Z,15Z) | PA/SM |
| 130 | 130 | 23.38 | C <sub>19</sub> H <sub>20</sub> O <sub>3</sub> | 297.1595 [M+H] <sup>+</sup>       | 3.4  | 282.124, 279.1376, 254.0926                                                      | 4.07 | Cryptotanshinone*                              | SM    |
| 131 | 131 | 23.6  | C <sub>16</sub> H <sub>30</sub> O <sub>2</sub> | 253.2177 [M-H] <sup>-</sup>       | 1.6  | 239.1700, 116.9287                                                               | 2.84 | 2-Pentadecenoic acid                           | PA    |
| 132 | 132 | 23.61 | C <sub>30</sub> H <sub>48</sub> O <sub>3</sub> | 455.3516 [M-H] <sup>-</sup>       | 3.3  | 412.2453, 394.2400, 227.2068, 206.8958, 116.9276                                 | -    | β-Ursolic acid                                 | SM    |
| 133 | 133 | 23.83 | C <sub>19</sub> H <sub>18</sub> O <sub>3</sub> | 295.1326 [M+H] <sup>+</sup>       | -1   | 277.1218, 249.1270, 235.0743, 207.0791, 179.0863,<br>141.0715                    | 3.78 | 1,2-Didehydrocryptotanshinone                  | SM    |
| 134 | 134 | 23.89 | C <sub>20</sub> H <sub>32</sub> O <sub>2</sub> | 303.233 [M-H] <sup>-</sup>        | 0    | 285.2180, 259.2444, 238.8341, 199.8497                                           | 3.31 | Arachidonic acid                               | PA    |
| 135 | 135 | 24.06 | C <sub>18</sub> H <sub>32</sub> O <sub>2</sub> | 279.233 [M-H] <sup>-</sup>        | 0    | 261.2697, 251.1058, 239.1436, 196.0272                                           | 3.1  | Linoleic acid                                  | PA    |

Note: Rt: retention time; SM: *Salvia miltiorrhiza* Bge.; AM: *Astragalus membranaceus* (Fisch.) Bge.var.*mongholicus* (Bge.) Hsiao; LC: *Ligusticum chuanxiong* Hort.; HN: *Hirudo nipponica* Whitman ; PA: *Pheretima aspergillum* (E.Perrier).

\*compared with a reference standard.
